# Supplementary material
Source: PubMed Central journal article supplement (PMC5921900)
Supplement: NIHMS959796-supplement-Supplementary_Information.pdf [file NIHMS959796-supplement-Supplementary_Information.pdf]

SUPPLEMENTARY INFORMATION

Supplementary Table S1 | Pivotal clinical trials investigating ICB in various tumour settings

| Disease                                                        | Treatment (target)                                                       | Results                                                                                                                                                          | FDA approval status                                                                                                                                                                                                                                                                                                                                                                                                                                                                                                                                                                                                                                                                                      | Reference |
|----------------------------------------------------------------|--------------------------------------------------------------------------|------------------------------------------------------------------------------------------------------------------------------------------------------------------|----------------------------------------------------------------------------------------------------------------------------------------------------------------------------------------------------------------------------------------------------------------------------------------------------------------------------------------------------------------------------------------------------------------------------------------------------------------------------------------------------------------------------------------------------------------------------------------------------------------------------------------------------------------------------------------------------------|-----------|
| <b>Histology agnostic</b>                                      |                                                                          |                                                                                                                                                                  |                                                                                                                                                                                                                                                                                                                                                                                                                                                                                                                                                                                                                                                                                                          |           |
| Progressive metastatic CRC and other cancers (dMMR or non-MMR) | Pembrolizumab (PD-1)                                                     | <ul style="list-style-type: none"> <li>dMMR CRC: ORR 40%; PFS 78%</li> <li>Non-dMMR CRC: ORR 0%; PFS 11%</li> <li>dMMR non-CRC: ORR 71%; PFS 67%</li> </ul>      | Approved in May 2017 (accelerated approval; trial ongoing) for adult and paediatric patients with unresectable or metastatic, MSI-H or dMMR solid tumours that have progressed after prior treatment (and for which no satisfactory alternative treatments remain), independent of the tumour's original location. The pivotal data for approval included patients from the KEYNOTE-016 ( <i>n</i> = 58), KEYNOTE-164 ( <i>n</i> = 61), KEYNOTE-012 ( <i>n</i> = 6), KEYNOTE-028 ( <i>n</i> = 5), and KEYNOTE-158 ( <i>n</i> = 19) trials. Pembrolizumab was administered at 200 mg every 3 weeks or 10 mg/kg every 2 weeks until disease progression, unacceptable toxicity, or for a maximum of 24 mo. | S1        |
| Advanced-stage dMMR cancers (12 different tumour types)        | Pembrolizumab                                                            | ORR 53%; CR rate 21%; 2-year PFS 53%; 2-year OS 64%                                                                                                              |                                                                                                                                                                                                                                                                                                                                                                                                                                                                                                                                                                                                                                                                                                          | S2        |
| Unresectable or metastatic MSI-H or dMMR solid tumours         | Pembrolizumab                                                            | <ul style="list-style-type: none"> <li>ORR 39.6%; responses lasted &gt;6 mo. for 78%</li> <li>ORRs similar for CRC (36%) and other cancer types (46%)</li> </ul> |                                                                                                                                                                                                                                                                                                                                                                                                                                                                                                                                                                                                                                                                                                          | S3        |
| <b>Melanoma</b>                                                |                                                                          |                                                                                                                                                                  |                                                                                                                                                                                                                                                                                                                                                                                                                                                                                                                                                                                                                                                                                                          |           |
| Unresectable or metastatic melanoma                            | Ipilimumab (CTLA-4) plus dacarbazine vs dacarbazine plus placebo         | Median OS 11.2 mo. vs 9.1 mo.; 1-year OS 47.3% vs 36.3%; 2-year OS 28.5% vs 17.9%; 3-year OS 20.8% vs 12.2%                                                      | Approved in March 2011 for unresectable or metastatic melanoma; expanded to paediatric patients aged ≥12 years in July 2017                                                                                                                                                                                                                                                                                                                                                                                                                                                                                                                                                                              | S4        |
| Unresectable or metastatic BRAF-wild-type melanoma             | Nivolumab (PD-1) plus placebo vs dacarbazine plus placebo                | Median PFS 5.1 mo. vs 2.2 mo.; 1-year OS 72.9% vs 42.1%                                                                                                          | Accelerated approval in December 2014 for unresectable or metastatic melanoma after ipilimumab or BRAF-targeted therapy, and in combination with ipilimumab for BRAF <sup>V600</sup> -wild-type tumours in October 2015 and independent of BRAF status in January 2016                                                                                                                                                                                                                                                                                                                                                                                                                                   | S5        |
| Unresectable or metastatic melanoma                            | Nivolumab vs chemotherapy (dacarbazine or paclitaxel plus carboplatin)   | ORR 31.7% vs 10.6%                                                                                                                                               | Accelerated approval in December 2014 for unresectable or metastatic melanoma after ipilimumab or BRAF-targeted therapy, and in combination with ipilimumab for BRAF <sup>V600</sup> -wild-type tumours in October 2015, and independent of BRAF status in January 2016                                                                                                                                                                                                                                                                                                                                                                                                                                  | S6        |
| Resected stage III or IV melanoma                              | Ipilimumab vs placebo                                                    | Median RFS 26.1 mo. vs 17.1 mo.; 3-year RFS 46.5% vs 34.8%                                                                                                       | Approved October 2015 for the adjuvant treatment of stage III melanoma (pathologic involvement of regional lymph nodes >1 mm)                                                                                                                                                                                                                                                                                                                                                                                                                                                                                                                                                                            | S7        |
| Unresectable or metastatic melanoma                            | Pembrolizumab every 2 weeks vs pembrolizumab every 3 weeks vs ipilimumab | ORR 33.7% vs 32.9% vs 11.9%; 6-mo. PFS 47.3% vs 46.4% vs 26.5%; 1-year OS 74.1% vs 68.4% vs 58.2%                                                                | Accelerated approval in September 2014 for unresectable or metastatic melanoma after ipilimumab or BRAF-targeted therapy 3-weekly schedule); approved as initial treatment in December 2015                                                                                                                                                                                                                                                                                                                                                                                                                                                                                                              | S8        |
| Unresectable or metastatic melanoma                            | Nivolumab plus ipilimumab vs ipilimumab plus placebo                     | ORR 61% vs 11%; median DoR not reached; median PFS not reached                                                                                                   | Accelerated approval in December 2014 for unresectable or metastatic melanoma after ipilimumab or BRAF-targeted therapy, and in combination with ipilimumab for BRAF <sup>V600</sup> -wild-type tumours in October 2015, and independent of BRAF status in January 2016                                                                                                                                                                                                                                                                                                                                                                                                                                  | S9        |
| Unresectable or metastatic melanoma                            | Nivolumab plus ipilimumab vs nivolumab vs ipilimumab                     | ITT: median PFS 11.5 mo. vs 2.9 mo. vs 6.9 mo.; median OS not reached vs 37.6 mo. vs 19.9 mo.; 3-year OS 58% vs 52% vs 34%                                       | Accelerated approval in December 2014 for unresectable or metastatic melanoma after ipilimumab or BRAF-targeted therapy, and in combination with ipilimumab for BRAF <sup>V600</sup> -wild-type tumours in October 2015, and independent of BRAF status in January 2016                                                                                                                                                                                                                                                                                                                                                                                                                                  | S10       |

|                                                                                  |                                                                                |                                                                                                                                                                                                                                                                                      |                                                                                                                                                                                                                            |     |
|----------------------------------------------------------------------------------|--------------------------------------------------------------------------------|--------------------------------------------------------------------------------------------------------------------------------------------------------------------------------------------------------------------------------------------------------------------------------------|----------------------------------------------------------------------------------------------------------------------------------------------------------------------------------------------------------------------------|-----|
| Unresectable or metastatic melanoma                                              | Ipilimumab 10 mg/kg vs 3 mg/kg                                                 | Median OS 15.7 m vs 11.5 m                                                                                                                                                                                                                                                           | Approved in March 2011 for unresectable or metastatic melanoma; expanded to paediatric patients aged ≥12 years in July 2017                                                                                                | S11 |
| Resected stage III or IV melanoma                                                | Nivolumab vs ipilimumab                                                        | 12-month RFS: 70.5% vs 60.8%                                                                                                                                                                                                                                                         | Approved in December 2017 for the adjuvant treatment of lymph node-positive or metastatic melanoma                                                                                                                         | S12 |
| <b>Lung cancer</b>                                                               |                                                                                |                                                                                                                                                                                                                                                                                      |                                                                                                                                                                                                                            |     |
| Advanced-stage squamous-cell NSCLC                                               | Nivolumab vs docetaxel                                                         | ORR 20% vs 9%; median PFS 3.5 mo. vs 2.8 mo.; median OS 9.2 mo. vs 6.0 mo.; 1-year OS 42% vs 24%                                                                                                                                                                                     | Approved in March 2015 for advanced-stage squamous-cell NSCLC that has progressed on or after platinum-based chemotherapy                                                                                                  | S13 |
| Advanced-stage non-squamous-cell NSCLC                                           | Nivolumab vs docetaxel                                                         | ORR 19% vs 12%; median OS 12.2 mo. vs 9.4 mo.; 1-year OS 51% vs 39%; 18-mo. OS 39% vs 23%                                                                                                                                                                                            | Approval expanded in October 2015 to include advanced-stage non-squamous NSCLC that has progressed on or after platinum-based chemotherapy                                                                                 | S14 |
| Advanced-stage NSCLC                                                             | Pembrolizumab 2mg/kg vs pembrolizumab 10mg/kg vs docetaxel                     | <ul style="list-style-type: none"> <li>ITT: median PFS 3.9 mo. vs 4.0 mo. vs 4.0 mo.; median OS 10.4 mo. vs 12.7 mo. vs 8.5 mo.</li> <li>PD-L1<sup>+</sup> tumours (≥50% positivity): median PFS 5.0 mo. vs 5.2 mo. vs 4.1 mo.; median OS 14.9 mo. vs 17.3 mo. vs 8.2 mo.</li> </ul> | Approved in October 2015 for advanced-stage PD-L1 <sup>+</sup> NSCLC (≥50% positivity) that has progressed on or after platinum-based chemotherapy; approval expanded to tumours with ≥1% PD-L1 positivity in October 2016 | S15 |
| Advanced-stage, EGFR/ALK-wild-type, PD-L1 <sup>+</sup> NSCLC                     | Pembrolizumab (200 mg fixed dose every 3 weeks) vs platinum-based chemotherapy | ORR 44.8% vs 27.8%; median DoR not reached vs 6.3 mo.; median PFS 10.3 mo. vs 6 mo.; 6-months OS 80.2% vs 72.4%                                                                                                                                                                      | Approved in October 2016 for the first-line treatment of advanced-stage, EGFR/ALK-wild-type, PD-L1 <sup>+</sup> NSCLC (≥50% positivity)                                                                                    | S16 |
| Advanced-stage NSCLC                                                             | Atezolizumab (PD-L1) vs docetaxel                                              | ORR 13.6% vs 13.4%; median DoR 16.3 mo. vs 6.2 mo.; median OS 13.8 mo. vs 9.6 mo.                                                                                                                                                                                                    | Approved in October 2016 for advanced-stage NSCLC that has progressed on or after platinum-based chemotherapy                                                                                                              | S17 |
| Advanced-stage, EGFR/ALK-wild-type non-squamous-cell NSCLC                       | Pembrolizumab plus carboplatin and pemetrexed vs carboplatin and pemetrexed    | ORR 55% vs 29%                                                                                                                                                                                                                                                                       | Accelerated approval of pembrolizumab plus carboplatin and pemetrexed granted in May 2017 for the first-line treatment of advanced-stage, EGFR/ALK-wild-type non-squamous-cell NSCLC, irrespective of PD-L1 expression     | S18 |
| Locally advanced, unresectable NSCLC                                             | Durvalumab (PD-L1) vs placebo (after chemoradiotherapy)                        | ORR 28.4% vs 16.0%; median PFS 16.8 mo. vs 5.6 months; 1-year PFS 55.9% vs 35.3%; 18-mo. PFS 44.2% vs 27.0%; median time to death or distant metastasis 23.2 mo. vs 14.6 mo.                                                                                                         | Approved in February 2018 for the consolidation treatment of unresectable stage III NSCLC that has not progressed after chemoradiotherapy                                                                                  | S19 |
| <b>Urological cancers</b>                                                        |                                                                                |                                                                                                                                                                                                                                                                                      |                                                                                                                                                                                                                            |     |
| Metastatic castration resistant prostate cancer (after progression on docetaxel) | Ipilimumab 10 mg/kg vs placebo (after bone-directed radiotherapy)              | Median OS 11.2 mo. vs 10 mo.                                                                                                                                                                                                                                                         | Not yet approved                                                                                                                                                                                                           | S20 |
| Advanced-stage clear-cell RCC (previously treated)                               | Nivolumab vs everolimus                                                        | ORR 25% vs 5%; median PFS 4.6 mo. vs 4.4 mo.; median OS 25 mo. vs 19.6 mo.                                                                                                                                                                                                           | Approval in November 2015 for metastatic RCC that has progressed after antiangiogenic therapy                                                                                                                              | S21 |
| Advanced-stage, platinum-resistant urothelial carcinoma                          | Atezolizumab                                                                   | <ul style="list-style-type: none"> <li>ITT: ORR 15%</li> <li>PD-L1 positivity ≥5%: ORR 26%</li> <li>PD-L1 positivity ≥1%: ORR 18%</li> </ul>                                                                                                                                         | Approval in May 2016 for advanced-stage urothelial carcinoma that has progressed during or following, or within 12 mo. of, platinum-containing chemotherapy                                                                | S22 |
| Advanced-stage urothelial carcinoma (untreated)                                  | Atezolizumab                                                                   | ORR 23%; CR rate was 9%; median PFS 2.7 mo.; median OS 15.9 mo.                                                                                                                                                                                                                      | Approval in April 2017 for advanced-stage urothelial carcinoma in patients who are not eligible for cisplatin chemotherapy                                                                                                 | S23 |
| Advanced-stage, platinum-resistant urothelial carcinoma                          | Nivolumab                                                                      | <ul style="list-style-type: none"> <li>ITT: ORR 19.6%</li> <li>PD-L1 positivity ≥5%: ORR 28.4%</li> <li>PD-L1 positivity ≥1%: ORR 23.8%</li> <li>PD-L1 positivity &lt;1%: ORR 16.1%</li> </ul>                                                                                       | Approval in February 2017 for advanced-stage urothelial carcinoma that has progressed during or following, or within 12 mo. of, platinum-containing chemotherapy                                                           | S24 |
| Advanced-stage, platinum-resistant urothelial carcinoma                          | Pembrolizumab vs chemotherapy (paclitaxel, docetaxel, or vinflunine)           | <ul style="list-style-type: none"> <li>ITT: median OS 10.3 mo. vs 7.4 mo.</li> <li>PD-L1<sup>+</sup> tumours (combined positive score ≥10%): median OS 8.0 mo. vs 5.2 mo.</li> </ul>                                                                                                 | Accelerated approval in May 2017 for advanced-stage urothelial carcinoma that has progressed during or following, or within 12 mo. of, platinum-containing chemotherapy                                                    | S25 |

|                                                                                              |                                               |                                                                                                                                                                                                                               |                                                                                                                                                                                                                                               |         |
|----------------------------------------------------------------------------------------------|-----------------------------------------------|-------------------------------------------------------------------------------------------------------------------------------------------------------------------------------------------------------------------------------|-----------------------------------------------------------------------------------------------------------------------------------------------------------------------------------------------------------------------------------------------|---------|
| Advanced-stage, platinum-resistant urothelial carcinoma                                      | Durvalumab                                    | <ul style="list-style-type: none"> <li>• ITT: ORR 17.8%; CR rate 3.7%.</li> <li>• PD-L1-high tumours: ORR 27.6%</li> <li>• PD-L1-low/negative tumours: ORR 5.1%</li> </ul>                                                    | Accelerated approval in May 2017 for advanced-stage urothelial carcinoma that has progressed during or following, or within 12 mo. of, platinum-containing chemotherapy                                                                       | S26     |
| <b>Gastrointestinal cancers</b>                                                              |                                               |                                                                                                                                                                                                                               |                                                                                                                                                                                                                                               |         |
| Advanced-stage hepatocellular carcinoma                                                      | Nivolumab                                     | ORR 20% in the dose-expansion phase and 15% in the dose-escalation phase                                                                                                                                                      | Accelerated approval in September 2017 for advanced-stage hepatocellular carcinoma previously treated with sorafenib                                                                                                                          | S27     |
| Recurrent or metastatic MSI-H or dMMR CRC                                                    | Nivolumab                                     | ORR 31.1%; 12-week disease control rate 69%; median DoR not reached at a median follow-up duration of 12 mo.                                                                                                                  | Accelerated approval in August 2017 for adult and paediatric patients (aged ≥12 years) with MSI-H or dMMR metastatic CRC that has progressed following treatment with a fluoropyrimidine, oxaliplatin, and irinotecan                         | S28     |
| Advanced-stage gastric or GEJ cancer after at least two prior standard chemotherapy regimens | Pembrolizumab                                 | <ul style="list-style-type: none"> <li>• ITT: ORR 11.2% ; CR rate 1.9%</li> <li>• PD-L1<sup>+</sup> tumours (≥1% positivity): ORR 15.5%; CR rate 2.0%</li> <li>• PD-L1<sup>-</sup> tumours: ORR 5.5%; CR rate 1.8%</li> </ul> | Accelerated approval in September 2017 for recurrent, advanced-stage, PD-L1 <sup>+</sup> gastric or GEJ cancer after ≥2 therapies including fluoropyrimidine- and platinum-containing chemotherapy and, if appropriate, HER2-targeted therapy | S29     |
| Advanced-stage gastric or GEJ cancer after at least two prior standard chemotherapy regimens | Nivolumab vs placebo                          | Median OS 5.3 mo. vs 4.1 mo.; 1-year OS 26.2% vs 10.9%                                                                                                                                                                        | Approved in Japan for recurrent locally advanced or metastatic, gastric or GEJ adenocarcinoma; not yet approved by the FDA                                                                                                                    | S30     |
| <b>Other cancers</b>                                                                         |                                               |                                                                                                                                                                                                                               |                                                                                                                                                                                                                                               |         |
| HNSCC                                                                                        | Nivolumab vs therapy of investigator's choice | ORR 26.1% vs 0%; median PFS 1.9 mo. vs 1.8 mo.; median OS 9.5 mo. vs 6.2 mo.                                                                                                                                                  | Approved in November 2016 for recurrent or metastatic HNSCC that has progressed on or after platinum-based therapy                                                                                                                            | S31     |
| HNSCC                                                                                        | Pembrolizumab                                 | ORR 18%; 6-mo. PFS 23%; 6-mo. OS 59%                                                                                                                                                                                          | Accelerated approval in August 2017 recurrent or metastatic HNSCC that has progressed on or after platinum-based therapy                                                                                                                      | S32     |
| Hodgkin lymphoma                                                                             | Pembrolizumab                                 | ORR 69%; CR rate 22.4%                                                                                                                                                                                                        | Accelerated approval in March 2017 for classical Hodgkin lymphoma that has progressed after ≥3 prior lines of therapy                                                                                                                         | S33     |
| Hodgkin lymphoma                                                                             | Nivolumab                                     | ORR 65%; CR rate 7%; median DoR 8.7 mo. (in a combined analysis of data from phase II CheckMate 205 trial and the phase I CheckMate 039 trial)                                                                                | Accelerated approval in May 2017 for classical Hodgkin lymphoma that has progressed after auto-HSCT and post-transplantation brentuximab vedotin                                                                                              | S34,S35 |

Auto-HSCT, autologous haematopoietic stem cell transplantation; CR, complete response; CRC, colorectal cancer; CTLA-4, cytotoxic T lymphocyte protein 4; dMMR, mismatch-repair deficient; DoR, duration of response; GEJ, gastroesophageal junction; HCC, hepatocellular carcinoma; HNSCC, head and neck squamous cell carcinoma; ICB, immune-checkpoint blockade; ITT, intention-to-treat population; mo., months; MSI-H, microsatellite instability-high; NSCLC, non-small-cell lung cancer; ORR, objective response rate; OS, overall survival; PD-1, programmed cell death protein 1; PD-L1, programmed cell death 1 ligand 1; PFS, progression-free survival; RCC, renal cell carcinoma; RFS, recurrence-free survival.

Supplementary Table S2 | FDA-approved agents targeting the VEGF axis

| Agent                                                                    | Activity                                                                               | Approved indication (according to FDA hematology/oncology approvals database)                                                                                                                 | PFS benefit <sup>a</sup>              | OS benefit <sup>a</sup>               | ClinicalTrial.gov identifier for pivotal study (publication) |
|--------------------------------------------------------------------------|----------------------------------------------------------------------------------------|-----------------------------------------------------------------------------------------------------------------------------------------------------------------------------------------------|---------------------------------------|---------------------------------------|--------------------------------------------------------------|
| <b>VEGF-neutralizing agents</b>                                          |                                                                                        |                                                                                                                                                                                               |                                       |                                       |                                                              |
| Ziv-aflibercept                                                          | VEGFR–Fc fusion protein soluble decoy receptor for VEGFA, VEGFB, and PlGF              | Metastatic CRC (in combination with FOLFIRI)                                                                                                                                                  | 2.2 mo.                               | 1.4 mo.                               | NCT00561470 (S36)                                            |
| Bevacizumab                                                              | Anti-VEGF-A antibody                                                                   | Metastatic CRC (with fluorouracil, and leucovorin)                                                                                                                                            | 4.47 mo.                              | 4.7 mo.                               | NA (S37)                                                     |
|                                                                          |                                                                                        | First-line treatment of metastatic CRC (with FOLFOX4)                                                                                                                                         | 2.6 mo.                               | 2.2 mo.                               | NCT00025337; E3200 (S38)                                     |
|                                                                          |                                                                                        | First-line treatment of advanced-stage NSCLC (with carboplatin and paclitaxel chemotherapy)                                                                                                   | 1.7 mo.                               | 2.0 mo.                               | NCT00021060; E4599 (S39)                                     |
|                                                                          |                                                                                        | Second-line treatment of glioblastoma (with irinotecan)                                                                                                                                       | 1.5 mo.                               | 0.5 mo.                               | NCT00345163; AVF3708g (S40)                                  |
|                                                                          |                                                                                        | Advanced-stage RCC (with IFN $\alpha$ )                                                                                                                                                       | 4.8 mo.                               | 2 mo.                                 | NCT00738530; AVOREN (S41)                                    |
|                                                                          |                                                                                        | Second-line treatment (with FOLFIRI) of metastatic CRC after progression on bevacizumab containing first-line treatment                                                                       | 1.6 mo.                               | 1.4 mo.                               | NCT00499369; ML18147 (S42)                                   |
|                                                                          |                                                                                        | Recurrent or persistent stage IVB cervical cancer (with paclitaxel and either cisplatin; or topotecan)                                                                                        | 3.1; 2.1 mo.                          | 3.3; 3.6 mo.                          | NCT00803062 (S43)                                            |
|                                                                          |                                                                                        | Platinum-resistant recurrent epithelial ovarian, fallopian tube, or primary peritoneal cancer (with paclitaxel, pegylated liposomal doxorubicin, or topotecan)                                | 3.4 (5.7 with paclitaxel) mo.         | 3.3 (9.2 with paclitaxel) mo.         | NCT00976911; AURELIA (S44)                                   |
|                                                                          |                                                                                        | Platinum-sensitive recurrent ovarian cancer (with gemcitabine+carboplatin (OCEAN), or with paclitaxel+carboplatin (GOG-0213))                                                                 | 4.0 mo. (OCEAN)<br>3.4 mo. (GOG-0213) | 0.7 mo. (OCEAN)<br>4.9 mo. (GOG-0213) | NCT00434642; OCEAN (S45)<br>NCT00565851; GOG-0213 (S46)      |
|                                                                          |                                                                                        | Glioblastoma that has progressed after chemoradiation (with lomustine)                                                                                                                        | 2.7 mo.                               | 0.5 mo.                               | NCT01290939; EORTC 26101 (S47)                               |
| <b>Angiogenesis inhibitors with dual VEGFR TKI and TIE2 TKI activity</b> |                                                                                        |                                                                                                                                                                                               |                                       |                                       |                                                              |
| Cabozantinib                                                             | MET, VEGFR2, and TIE2 TKI                                                              | Advanced-stage RCC that has progressed after VEGFR TKI treatment                                                                                                                              | 3.6 mo.                               | 4.9 mo.                               | NCT01865747; METEOR (S48)                                    |
|                                                                          |                                                                                        | Advanced-stage medullary thyroid cancer                                                                                                                                                       | 7.2 mo.                               | NA                                    | NCT00704730; EXAM (S49)                                      |
| Regorafenib                                                              | VEGFR2/3, RET, KIT, TIE2, PDGFR and RAF TKI                                            | Advanced-stage GIST                                                                                                                                                                           | 3.9 mo.                               | NS                                    | NCT01271712; GRID (S50)                                      |
|                                                                          |                                                                                        | Metastatic CRC                                                                                                                                                                                | 0.2 mo.                               | 1.5 mo.                               | NCT01103323; CORRECT (S51)                                   |
|                                                                          |                                                                                        | HCC (after sorafenib)                                                                                                                                                                         | 1.9 mo.                               | 2.9 mo.                               | NCT01774344; RESORCE (S52)                                   |
| Sorafenib                                                                | VEGFR1–3, PDGFR $\alpha$ / $\beta$ , FGFR1–4, KIT, RET, FLT3, CRAF, BRAF, and TIE2 TKI | Unresectable and/or metastatic RCC                                                                                                                                                            | 2.7 mo.                               | 2.6 mo.                               | NCT00073307 (S53)                                            |
|                                                                          |                                                                                        | Advanced-stage HCC                                                                                                                                                                            | 2.8 mo.                               | 2.8 mo.                               | NCT00105443 (S54)                                            |
|                                                                          |                                                                                        | Locally recurrent or metastatic progressive DTC refractory to radioactive iodine treatment                                                                                                    | 5.0 mo.                               | NA                                    | NCT00984282 (S55)                                            |
| <b>Antiangiogenic agents with activity against VEGFRs</b>                |                                                                                        |                                                                                                                                                                                               |                                       |                                       |                                                              |
| Axitinib                                                                 | VEGFR1–3 and PDGFR $\beta$ TKI                                                         | Advanced-stage RCC                                                                                                                                                                            | 2.0 mo.                               | 0.9 mo.                               | NCT00678392 (S56)                                            |
| Lenvatinib                                                               | VEGFR1–3, PDGFR $\alpha$ , and FGFR1–4 TKI                                             | Recurrent or metastatic radioactive iodine-refractory DTC                                                                                                                                     | 14.7 mo.                              | NS                                    | NCT01321554; SELECT (S57)                                    |
|                                                                          |                                                                                        | Advanced-stage RCC (in combination with everolimus)                                                                                                                                           | 9.1 mo.                               | 10.1 mo.                              | NCT01136733 (S58)                                            |
| Pazopanib                                                                | KIT, FGFR1/2, PDGFR $\beta$ , and VEGFR1–3 TKI                                         | Advanced-stage soft-tissue sarcoma (after chemotherapy)                                                                                                                                       | 3.0 mo.                               | 1.9 mo.                               | NCT02049905 (S59)                                            |
|                                                                          |                                                                                        | Advanced-stage RCC                                                                                                                                                                            | 5.0 mo.                               | 2.4 mo.                               | NCT00334282 (S60)                                            |
| Ramucirumab                                                              | Anti-VEGFR2 antibody                                                                   | Second-line treatment of metastatic CRC (in combination with FOLFIRI)                                                                                                                         | 1.2 mo.                               | 1.6 mo.                               | NCT01183780; RAISE (S61)                                     |
|                                                                          |                                                                                        | Platinum-resistant metastatic NSCLC (in combination with docetaxel)                                                                                                                           | 1.5 mo.                               | 1.4 mo.                               | NCT01168973; REVEL (S62)                                     |
|                                                                          |                                                                                        | Advanced-stage gastric or gastroesophageal junction adenocarcinoma (in combination with paclitaxel), after progression on or after fluoropyrimidine-based or platinum-containing chemotherapy | 1.5 mo.                               | 2.2 mo.                               | NCT02359058; RAINBOW (S63)                                   |

|            |                                                                  |                                                                    |                |         |                           |
|------------|------------------------------------------------------------------|--------------------------------------------------------------------|----------------|---------|---------------------------|
|            |                                                                  | Advanced-stage gastric or gastroesophageal junction adenocarcinoma | 0.8 mo.        | 1.4 mo. | NCT00917384; REGARD (S64) |
| Sunitinib  | VEGFR1–3, PDGFR $\alpha/\beta$ , KIT, RET, FLT3, and G-CSF-R TKI | Advanced-stage clear-cell RCC (in combination with IFN $\alpha$ )  | 6.6 mo.        | 4.9mo.  | NCT00083889 (S65)         |
|            |                                                                  | GIST (after failure of imatinib)                                   | 4.2 mo.        | 1.5 mo. | NCT00075218 (S66)         |
|            |                                                                  | Advanced-stage PNET                                                | 4.9 mo.        | NA      | NCT00428597 (S67)         |
|            |                                                                  | High-risk clear-cell RCC after nephrectomy                         | 14.4 mo. (DFS) | NA      | NCT00375674 (S68)         |
| Vandetanib | VEGFR1–3, EGFR, RET, and PDGFR $\alpha/\beta$ TKI                | Unresectable, locally advanced, or metastatic MTC                  | 11.3 mo.       | 16 mo.  | NCT00410761 (S69)         |

CRC, colorectal cancer; DFS, disease-free survival; DTC, differentiated thyroid carcinoma; EGFR, epithelial growth factor receptor; FGFR, fibroblast growth factor receptor; FOLFIRI, folinic acid (leucovorin), 5-fluorouracil, and irinotecan; FOLFOX4, folinic acid (leucovorin), 5-fluorouracil, and oxaliplatin; G-CSF-R, granulocyte colony-stimulating factor receptor; GIST, gastrointestinal stromal tumour; HCC, hepatocellular carcinoma; IFN $\alpha$ , interferon  $\alpha$ ; mo., months; MTC, medullary thyroid carcinoma; NA, not available; NS, not statistically significant; NSCLC, non-small-cell lung cancer; OS, overall survival; PDGFR, platelet-derived growth factor receptor; PFS, progression-free survival; PIGF, placenta growth factor; PNET, pancreatic neuroendocrine tumour; RCC, renal cell carcinoma; TIE2, angiotensin 1 receptor; VEGF, vascular endothelial growth factor; VEGFR, vascular endothelial growth factor receptor. <sup>a</sup> Comparators varied between trials; see ClinicalTrials.gov database entries for details. When the outcomes are not available in ClinicalTrials.gov, we entered the value from final/most recent publication.

Supplementary Table S3 | **Bevacizumab biosimilars under development**

| Company                   | Biosimilar                              | Clinical development stage (disease setting)                                                                                                          | Status and results                                                                           | ClinicalTrial.gov identifier (publication)               |
|---------------------------|-----------------------------------------|-------------------------------------------------------------------------------------------------------------------------------------------------------|----------------------------------------------------------------------------------------------|----------------------------------------------------------|
| Amgen/<br>Allergan        | Mvasi<br>(bevacizumab-awwb,<br>ABP 215) | Phase III (NSCLC): Mvasi plus PC vs bevacizumab plus PC<br>FDA approved <sup>a</sup> on 9/14/2017 for mCRC and advanced-stage NSCLC with chemotherapy | Completed: Mvasi and bevacizumab clinically equivalent in patients with advanced-stage NSCLC | NCT01966003 (S70)                                        |
| Apobiologix               | Not announced                           | In pipeline                                                                                                                                           | Unknown                                                                                      | NA                                                       |
| AstraZeneca               | FKB238                                  | Phase III (NSCLC): FKB238 plus PC vs bevacizumab plus PC                                                                                              | Recruiting                                                                                   | NCT02810457                                              |
| Biocad                    | BCD-021                                 | Phase III (NSCLC): BCD 021 plus PC vs bevacizumab plus PC<br>Approved in Russia                                                                       | Completed; BCD-021 non-inferior to bevacizumab in patients with advanced-stage NSCLC         | NCT01763645 (S71)                                        |
| BioXpress                 | BX2314                                  | In pipeline                                                                                                                                           | Unknown                                                                                      | NA                                                       |
| BioXpress                 | BX0510                                  | In pipeline                                                                                                                                           | Unknown                                                                                      | NA                                                       |
| Boehringer<br>Ingelheim   | BI 695502                               | Phase III (NSCLC): BI 695502 plus PC vs bevacizumab plus PC                                                                                           | Active, not recruiting                                                                       | NCT02272413                                              |
| Celltrion Inc.            | CT-P16                                  | In pipeline                                                                                                                                           | Unknown                                                                                      | NA                                                       |
| Coherus<br>BioSciences    | CHS-5217                                | In pipeline                                                                                                                                           | Unknown                                                                                      | NA                                                       |
| Hetero                    | Cizumab                                 | Data on clinical development not available<br>Approved in India for mCRC                                                                              | Unknown                                                                                      | Clinical Trial Registry<br>India:<br>CTRI/2015/05/005757 |
| mAbxience                 | BEVZ92                                  | Phase I (mCRC)                                                                                                                                        | Active, not recruiting                                                                       | NCT02069704                                              |
| Oncobiologics             | ONS-1045                                | Phase III                                                                                                                                             | Clinical trial planning phase                                                                | NA                                                       |
| Pfizer                    | PF-06439535                             | Phase III (NSCLC): PF-06439535 plus PC vs bevacizumab plus PC                                                                                         | Active, not recruiting                                                                       | NCT02364999                                              |
| PlantForm                 | Not announced                           | In pipeline                                                                                                                                           | Unknown                                                                                      | NA                                                       |
| Reliance Life<br>Sciences | R-TPR-023                               | Approved in India for mCRC based on findings of a clinical trial in primary and mCRC                                                                  | Clinical data not available                                                                  | Clinical Trial Registry<br>India:<br>CTRI/2013/05/003699 |
| Samsung<br>Bioepis        | SB8                                     | Phase III (NSCLC): SB8 plus PC vs bevacizumab plus PC                                                                                                 | Active, not recruiting                                                                       | NCT02754882                                              |

On the basis of a systematic search of the PubMed and ClinicalTrials.gov databases using search terms 'biosimilar' and 'bevacizumab' and selected from the abbreviations list. mCRC, metastatic colorectal cancer; NA, not applicable; NSCLC, non-small-cell lung cancer; PC, paclitaxel and carboplatin chemotherapy. <sup>a</sup>On 14 September 2017, the US FDA approved Mvasi (bevacizumab-awwb) as a biosimilar to bevacizumab; Mvasi is the first bevacizumab biosimilar approved in the USA for the treatment of cancer.

Supplementary Table S4 | The influences of VEGF and ANG2 on different immune, endothelial, and cancer cells

| Cell type                 | Predominant VEGF receptor                        | Cellular response to VEGF                                                                                                                                                                                                                                                                                                                                                                                                                                                            | TIE2 expression    | Cellular response to ANG2                                                                                                                                                                                                                                                                                                                                                                                                                                                                     |
|---------------------------|--------------------------------------------------|--------------------------------------------------------------------------------------------------------------------------------------------------------------------------------------------------------------------------------------------------------------------------------------------------------------------------------------------------------------------------------------------------------------------------------------------------------------------------------------|--------------------|-----------------------------------------------------------------------------------------------------------------------------------------------------------------------------------------------------------------------------------------------------------------------------------------------------------------------------------------------------------------------------------------------------------------------------------------------------------------------------------------------|
| DCs                       | VEGFR3<br>(REF. S72)                             | Inhibits the function and maturation of DCs <sup>S73</sup><br>Enables DCs to secrete angiogenic factors <sup>S74</sup>                                                                                                                                                                                                                                                                                                                                                               | Not known          | Not known                                                                                                                                                                                                                                                                                                                                                                                                                                                                                     |
| Monocytes and macrophages | VEGFR1<br>VEGFR3<br>(REF. S75)                   | Drives recruitment of macrophages to the tumour <sup>S76</sup><br>Polarises macrophages towards a pro-tumour M2 phenotype <sup>S76</sup>                                                                                                                                                                                                                                                                                                                                             | Yes <sup>S77</sup> | Promotes the recruitment of pro-tumour and pro-metastatic monocytes and macrophages<br>Increased IL-10 production by subset of macrophages, enhancing an anti-inflammatory phenotype <sup>S78</sup><br>Upregulates ICAM1 expression on ECs, leading to enhanced adhesion of monocytes and macrophages <sup>S79</sup><br>Induces expression of CCL2, a monocyte chemoattractant <sup>S80</sup><br>Inhibits the release of TNF, restricting the antitumour activity of monocytes <sup>S80</sup> |
| T cells                   | VEGFR1<br>VEGFR2<br>(REF. S81,S82)               | Inhibits T cell development <sup>S83</sup><br>Co-stimulates IFN $\gamma$ production, and increase T cell chemotaxis <sup>S81</sup>                                                                                                                                                                                                                                                                                                                                                   | Not known          | Suppresses T cell proliferation <sup>S78</sup>                                                                                                                                                                                                                                                                                                                                                                                                                                                |
| T <sub>reg</sub> cells    | VEGFR2<br>NRP1<br>(REF. S82)                     | Fosters T <sub>reg</sub> cell trafficking, proliferation, activation and maintenance of T <sub>reg</sub> cells in the tumour site <sup>S84</sup><br>Chemotactic for T <sub>reg</sub> cells <sup>S85</sup>                                                                                                                                                                                                                                                                            | Not known          | Promotes T <sub>reg</sub> cell recruitment and expansion <sup>S78</sup><br>Increases VEGF production and thereby promotes angiogenesis <sup>S86,S87</sup>                                                                                                                                                                                                                                                                                                                                     |
| ECs                       | VEGFR1<br>VEGFR2<br>VEGFR3<br>NRP1<br>(REF. S88) | Promotes EC proliferation <sup>S86</sup><br>Interaction with immune cells is context dependent<br>Upregulation of EC adhesion molecules (ICAM1, VCAM1, E-selectin) that mediate interactions with NK cells <sup>S89</sup><br>Upregulation of CLEVER-1/stablin-1 (increased T <sub>reg</sub> cell and M2 macrophage infiltration) <sup>S90</sup> and FasL (CTL infiltration decreased) <sup>S91</sup><br>Increased immune cell infiltration by antiangiogenic therapies <sup>94</sup> | Yes <sup>S95</sup> | Activities of ANG2 are context dependent: TIE2 antagonist in the context of VEGF signalling – destabilizes quiescent vessels and promotes angiogenesis <sup>S93</sup> ; TIE2 agonist and inhibitor of angiogenesis in tumours with low expression of VEGF <sup>S94</sup><br>Dual VEGF–TIE2 blockade promotes PD-L1 expression <sup>S95</sup>                                                                                                                                                  |
| Tumour cells              | VEGFR1<br>VEGFR2<br>NRP1<br>(REF. S96)           | Increases the migration, mobility and invasiveness of tumour cells <sup>S96</sup>                                                                                                                                                                                                                                                                                                                                                                                                    | Yes <sup>S97</sup> | Not known                                                                                                                                                                                                                                                                                                                                                                                                                                                                                     |

ANG2, angiopoietin 2; CCL2, C-C-motif chemokine 2; CLEVER-1, common lymphatic endothelial and vascular endothelial receptor-1; DCs, dendritic cells; ECs, endothelial cells; FasL, FAS ligand (also known as tumour necrosis factor ligand superfamily member 6); ICAM1, intercellular adhesion molecule 1; IL-10, interleukin 10; IFN $\gamma$ , interferon  $\gamma$ ; NK, natural killer; NRP1, neuropilin-1; PD-L1, programmed cell death 1 ligand 1; TIE2, angiopoietin 1 receptor; TNF, tumour necrosis factor; T<sub>reg</sub>, regulatory T; VCAM1, vascular cell adhesion molecule 1; VEGF, vascular endothelial growth factor; VEGFR, vascular endothelial growth factor receptor.

Supplementary Table S5 | **Preclinical studies investigating the roles of ANG2 signalling in cancer metastasis and invasion**

| Agent                                                                     | Cancer (mouse model)                                    | Results                                                                                                                             | Reference |
|---------------------------------------------------------------------------|---------------------------------------------------------|-------------------------------------------------------------------------------------------------------------------------------------|-----------|
| <b>ANG2 inhibition</b>                                                    |                                                         |                                                                                                                                     |           |
| 3.19.3 (anti-ANG2 mAb) or LC06 derivative <sup>S98</sup> (anti-ANG2 mAbs) | Metastatic breast cancer (MMTV-PyMT), PNET (RIP1-Tag2)  | ANG2 blockade decreased angiogenesis, tumour growth and metastasis                                                                  | S99       |
|                                                                           | Breast cancer (4T1), lung cancer (Lewis lung carcinoma) | ANG2 inhibition decreased metastatic growth in models of post-surgical adjuvant therapy                                             | S100      |
|                                                                           | Breast cancer with lung metastasis (4T1)                | Pericyte depletion plus ANG2 inhibition restored vascular integrity, decreased tumour growth, and reduced metastasis                | S101      |
| <b>VEGF plus ANG2</b>                                                     |                                                         |                                                                                                                                     |           |
| 3.19.3 and DC101 (anti-VEGFR2 mAb)                                        | PNET (RIP1-Tag2), metastatic breast cancer (MMTV-PyMT)  | Dual ANG2/VEGFR2 causes hypoxia but not increased metastasis in PNETs                                                               | S102      |
| <b>ANG2 overexpression</b>                                                |                                                         |                                                                                                                                     |           |
| Commercially available MMP2 inhibitor                                     | Glioblastoma (U87MG, U373MG, T98G)                      | Overexpression of ANG2 leads to increased MMP2 levels and enhanced glioblastoma cell invasion, which was reduced by MMP2 inhibition | S103      |
| NA                                                                        | PDAC (MiaPaca-2 and Capan-1)                            | ANG2 overexpression leads to lymphangiogenesis and lymphatic metastasis                                                             | S104      |
| NA                                                                        | Breast cancer (MCF-7) <sup>a</sup>                      | ANG2 overexpression leads to increased lymph-node invasion and increased tumour metastasis                                          | S105      |
| NA                                                                        | Glioblastoma (U87)                                      | ANG2 overexpression induces glioblastoma cell invasion through the Fak/Bcar1/Erk1/2 and Jnk, and via $\alpha_5\beta_1$ integrin     | S106,S107 |

On the basis of a systematic search of the PubMed database using selected search terms from the abbreviations list. ANG2, angiopoietin 2; Bcar1, Breast cancer anti-oestrogen resistance protein 1 (also known as p130cas); Erk1/2, extracellular signal regulated kinase 1 and/or 2; Fak, focal adhesion kinase 1; Jnk, Janus kinase; mAb, monoclonal antibody; MMP2, matrix metalloproteinase 2 (also known as 72 kDa type IV collagenase); NA, not applicable; PDAC, pancreatic adenocarcinoma; PNET, pancreatic neuroendocrine tumour; VEGF, vascular endothelial growth factor; VEGFR2, vascular endothelial growth factor receptor 2. <sup>a</sup>Results of a study of human breast cancers showed overexpression of ANG2 correlates with a high risk of nodal invasion, and poor disease-free and overall survival outcomes<sup>S108</sup>.



Supplementary Table S6 | Clinical studies on the prognostic and predictive potential of ANG2

| Agent (target)                                                                            | Disease                       | Results                                                                                                                                                                                                                                            | Reference |
|-------------------------------------------------------------------------------------------|-------------------------------|----------------------------------------------------------------------------------------------------------------------------------------------------------------------------------------------------------------------------------------------------|-----------|
| <b>ANG2 levels as a potential predictive biomarker</b>                                    |                               |                                                                                                                                                                                                                                                    |           |
| <i>Pan-VEGFR TKIs</i>                                                                     |                               |                                                                                                                                                                                                                                                    |           |
| Sorafenib (VEGFR1–3, PDGFRα/β, FGFR1–4, KIT, RET, FLT3, CRAF, BRAF, and TIE2)             | Advanced-stage HCC            | Circulating ANG2 and VEGF levels were independent predictor of survival                                                                                                                                                                            | S109      |
| Sunitinib (VEGFR1–3, PDGFRα/β, KIT, RET, FLT3, G-CSF-R)                                   | Metastatic RCC                | Low baseline levels of circulating ANG2 and high baseline MMP2 levels associated with tumour response                                                                                                                                              | S110      |
| <i>No antiangiogenic treatment</i>                                                        |                               |                                                                                                                                                                                                                                                    |           |
| Surgery                                                                                   | Breast cancer                 | Tumour ANG2 mRNA expression correlated with lymph-node invasion and unfavourable overall survival                                                                                                                                                  | S108      |
| Surgery                                                                                   | Advanced-stage HCC            | Tumour ANG2 expression negatively correlated with progression-free survival                                                                                                                                                                        | S111      |
| Unclear, archival samples                                                                 | Metastatic melanoma           | High circulating soluble ANG2 level is a biomarker of disease progression and metastasis in melanoma and correlates with greater tumour load and unfavourable overall survival                                                                     | S112      |
| Platinum-based chemotherapy                                                               | Ovarian cancer                | High serum ANG2 levels predictive of poor recurrence-free and overall survival                                                                                                                                                                     | S113      |
| Unclear, archival samples                                                                 | Neuroendocrine tumours        | Circulating ANG2 levels correlated with metastatic vs localized disease and unfavourable overall survival                                                                                                                                          | S114      |
| Unclear, archival samples                                                                 | Pancreatic adenocarcinoma     | Circulating ANG2 levels correlated with extent of lymphatic metastasis and survival                                                                                                                                                                | S104      |
| Unclear, archival samples                                                                 | Small-cell lung cancer        | High baseline circulating levels of ANG2 correlated with worse survival                                                                                                                                                                            | S115      |
| Unclear, archival samples                                                                 | Breast cancer                 | Tumour ANG2 mRNA overexpression associated with unfavourable recurrence-free survival                                                                                                                                                              | S101      |
| Unclear, archival samples                                                                 | Glioblastoma                  | High tumour ANG2/ANGPT2 expression correlated with unfavourable survival                                                                                                                                                                           | S116      |
| Standard of care (RT + temozolomide)                                                      | Glioblastoma                  | High tumour ANGPT2 expression across molecular subtypes and treatment settings                                                                                                                                                                     | S117      |
| Unclear, archival samples                                                                 | Oral squamous cell carcinoma  | Tumour ANG2 protein expression positively correlated with angiogenesis and overall survival                                                                                                                                                        | S118      |
| NA                                                                                        | Lung cancer                   | Serum ANG2 levels correlated with tumour stage; ANG2 levels were higher if lymph node metastasis was present; high ANG2 levels portended a worse prognosis                                                                                         | S119      |
| <b>ANG2 levels as a candidate biomarker for the outcome anti-VEGF therapy</b>             |                               |                                                                                                                                                                                                                                                    |           |
| <i>Anti-VEGFA antibody therapy</i>                                                        |                               |                                                                                                                                                                                                                                                    |           |
| Bevacizumab (VEGFA)                                                                       | Glioblastoma                  | ANG2 levels increased at disease recurrence/progression                                                                                                                                                                                            | S120      |
|                                                                                           | Metastatic colorectal cancer  | Low ANG2 level were predictive of a better outcome with bevacizumab therapy                                                                                                                                                                        | S121      |
|                                                                                           | Advanced-stage gastric cancer | ANG2 levels prognostic of overall survival and liver metastasis, but were not predictive of bevacizumab efficacy                                                                                                                                   | S122      |
| <i>VEGFR-TKI therapy</i>                                                                  |                               |                                                                                                                                                                                                                                                    |           |
| AZD2171 (VEGFR1–3)                                                                        | Glioblastoma                  | ANG2 levels initially dropped and then increased after AZD2171 therapy                                                                                                                                                                             | S123      |
| Sunitinib                                                                                 | RCC                           | ANG2 levels increased after disease progression on sunitinib                                                                                                                                                                                       | S124      |
| <b>ANG2 levels as a candidate biomarker for the outcome of anti-VEGF therapy plus ICB</b> |                               |                                                                                                                                                                                                                                                    |           |
| Ipilimumab (CTLA-4) plus bevacizumab, or nivolumab or pembrolizumab (PD-1)                | Metastatic melanoma           | High circulating ANG2 levels before ICB correlated with poor treatment response and survival; ICB alone increased serum ANG2 levels early after treatment initiation, whereas ipilimumab plus bevacizumab treatment decreased serum concentrations | S125      |

On the basis of a systematic search of the PubMed and Google scholar databases and the *Journal of Clinical Oncology* website using selected search terms from the abbreviations list. ANG2, angiopoietin 2; CTLA-4, cytotoxic T lymphocyte protein 4; FGFR, fibroblast growth factor receptor; G-CSF-R, granulocyte colony-stimulating factor receptor; HCC, hepatocellular carcinoma; ICB, immune-checkpoint blockade; MMP2, matrix metalloproteinase 2 (also known as 72 kDa type IV collagenase); PD-1, programmed cell death protein 1; PDGFR, platelet-derived growth factor receptor; RCC, renal cell carcinoma; TIE2, angiopoietin 1 receptor; TKI, tyrosine kinase inhibitor; VEGF, vascular endothelial growth factor; VEGFR, vascular endothelial growth factor receptor.

Supplementary Table S7 | **Preclinical studies of inhibitors of ANG2 or ANG1/2 signalling**

| Agent(s)                                                                   | Cancer (model)                                                                                                                           | Results                                                                                                                                           | Reference |
|----------------------------------------------------------------------------|------------------------------------------------------------------------------------------------------------------------------------------|---------------------------------------------------------------------------------------------------------------------------------------------------|-----------|
| <b>Anti-ANG2 agents</b>                                                    |                                                                                                                                          |                                                                                                                                                   |           |
| 3.19.3 (mAb)                                                               | Hepatocellular carcinoma (PLCPRF/5) or pancreatic cancer (HPAC)                                                                          | Decreased tumour growth; combination of MEDI3617 and bevacizumab resulted in greater inhibition of tumour growth compared with either monotherapy | S126      |
|                                                                            | Subcutaneous: colon epidermoid carcinoma (A431) or colon cancers (Lovo, SW480, Colo205)<br>Orthotopic: breast cancers (MCF7, MDA-MB-231) | Decreased tumour growth                                                                                                                           | S127      |
| LC06 and LC08 (mAbs)                                                       | Colon cancer (Colo205; subcutaneous) or choroidal neovascularization model                                                               | Decreased tumour growth, and reduced tumour MVD                                                                                                   | S128      |
| Nesvacumab (REGN910/SAR307746; mAb)                                        | Prostate (PC3), colon (Colo205), or epidermoid carcinoma (A431)                                                                          | Decreased tumour growth                                                                                                                           | S129      |
| A11 (peptibody)                                                            | Colon cancer (HCT116/CCL-247) or retinal angiogenesis model                                                                              | Induced tumour cell apoptosis and reduced tumour MVD                                                                                              | S130      |
| LC06 (mAb)                                                                 | Colon cancer (Colo205) or breast cancer (KPL-4)                                                                                          | Reduced tumour MVD, increased vascular maturity, and decreased tumour growth                                                                      | S98       |
| LC06 derivative (mAb)                                                      | Breast cancer (4T1) or lung cancer (Lewis lung carcinoma)                                                                                | Decreased tumour growth in models of postsurgical adjuvant therapy                                                                                | S100      |
| CVX-060 (PF-04856884; anti-ANG2 peptibody)                                 | Colon cancer (Colo205)                                                                                                                   | Reduced tumour MVD and decreased tumour growth                                                                                                    | S131      |
| <b>Anti-ANG1/2 agents</b>                                                  |                                                                                                                                          |                                                                                                                                                   |           |
| AMG 780 (anti-ANG1/2 mAb) and trebananib (AMG 386; anti-ANG1/2 peptibody)  | Colon cancer (Colo205)                                                                                                                   | Decreased tumour growth and decreased viable tumour and tumour cell proliferation with AMG 780 than with trebananib                               | S132      |
| Trebananib, L1-7(N) (anti-ANG2 peptibody), and mL4-3 (anti-ANG1 peptibody) | Colon cancer (Colo205)                                                                                                                   | Decreased tumour growth and reduced tumour MVD compared with ANG1 or ANG2 inhibition alone                                                        | S133      |
| <b>VE-PTP inhibition</b>                                                   |                                                                                                                                          |                                                                                                                                                   |           |
| AKB-9778 (VE-PTP inhibitor that activates TIE2 signalling)                 | Breast cancers (4T1, E0771)                                                                                                              | Increased vascular maturity, reduced metastasis, and prolonged survival                                                                           | S134      |
| <b>TIE2 activator</b>                                                      |                                                                                                                                          |                                                                                                                                                   |           |
| ABTAA (anti-ANG2 mAb that activates TIE2)                                  | Glioma (GL261), lung cancer (Lewis lung carcinoma) or breast cancer (MMTV-PyMT)                                                          | Decreased tumour growth, prolonged survival, and enhanced the efficacy of chemotherapy                                                            | S135      |

On the basis of a systematic search of the PubMed and Google scholar databases and the *Journal of Clinical Oncology* website using selected search terms from the abbreviations list. ANG1, angiopoietin 1; ANG2, angiopoietin 2; mAb, monoclonal antibody; MST1R, macrophage-stimulating protein receptor; MVD, microvessel density; PDGFR, platelet-derived growth factor receptor; TIE2, angiopoietin 1 receptor; TKI, tyrosine kinase inhibitor; VEGF, vascular endothelial growth factor; VEGFR, vascular endothelial growth factor receptor; VE-PTP, vascular endothelial protein tyrosine phosphatase (also known as receptor-type tyrosine-protein phosphatase  $\beta$ ).

Supplementary Table S8 | Clinical studies investigating ANG2 or dual ANG1/2 inhibitors

| Treatments                                                                                           | Disease                                               | Results                                                                                                                                             | Phase; status                                       | ClinicalTrials.gov identifier (publication) |
|------------------------------------------------------------------------------------------------------|-------------------------------------------------------|-----------------------------------------------------------------------------------------------------------------------------------------------------|-----------------------------------------------------|---------------------------------------------|
| <b>Anti-ANG2 or ANG1/2 mAbs</b>                                                                      |                                                       |                                                                                                                                                     |                                                     |                                             |
| Nesvacumab (REGN910/SAR307746 (anti-ANG2 mAb)                                                        | Advanced-stage solid tumours                          | Safe at all doses tested; recommended phase II dose 20 mg/kg every 2 weeks                                                                          | Phase I; completed                                  | NCT01271972 (S136)                          |
| AMG 780 (anti-ANG1/2 mAb)                                                                            | Advanced-stage solid tumours                          | AMG 780 administration possible up to 30 mg every 2 weeks                                                                                           | Phase I; terminated <sup>a</sup>                    | NCT01137552 (S137)                          |
| <b>Combination of ANG2 inhibition and ICB</b>                                                        |                                                       |                                                                                                                                                     |                                                     |                                             |
| MEDI3617 (anti-ANG2 mAb) and tremelimumab (anti-CTLA-4 mAb)                                          | Metastatic melanoma                                   | Ongoing                                                                                                                                             | Phase I; active, not recruiting                     | NCT02141542                                 |
| <b>Anti-ANG2 or anti-ANG1/2 peptibodies</b>                                                          |                                                       |                                                                                                                                                     |                                                     |                                             |
| <i>Phase I studies</i>                                                                               |                                                       |                                                                                                                                                     |                                                     |                                             |
| CVX-060 (PF-04856884; anti-ANG2 peptibody)                                                           | Advanced-stage solid tumours                          | Limited toxicities observed                                                                                                                         | Phase I; completed                                  | NCT00879684                                 |
| Trebananib (AMG 386; anti-ANG1/2 peptibody that inhibits ANG1 to a greater degree than it does ANG2) | Advanced-stage solid tumours                          | Acceptable safety at 30 mg/kg weekly; efficacy observed as monotherapy                                                                              | Phase I; completed                                  | NCT00102830 (S138)                          |
|                                                                                                      | Advanced-stage solid tumours                          | Drug well tolerated in paediatric patients                                                                                                          | Phase I; completed                                  | NCT01538095 (S139)                          |
|                                                                                                      | Advanced-stage solid tumours                          | Acceptable safety at 30 mg/kg weekly; efficacy observed as a monotherapy                                                                            | Phase I; complete                                   | NCT02525536 (S140)                          |
| Trebananib + temsirolimus (mTOR inhibitor)                                                           | Advanced-stage solid tumours                          | MTD exceeded at 15 mg/kg and 20 mg/kg of trebananib                                                                                                 | Phase I; completed                                  | NCT01548482, (S141)                         |
| Trebananib + paclitaxel                                                                              | Advanced-stage solid tumours                          | No results available                                                                                                                                | Phase I; completed                                  | NCT01331941                                 |
|                                                                                                      |                                                       | No drug–drug interaction between trebananib and paclitaxel                                                                                          | Phase Ib; completed                                 | NCT01992341 (S142)                          |
| Trebananib and cytarabine                                                                            | Adult acute myeloid leukaemia                         | Trebananib ± cytarabine well tolerated                                                                                                              | Phase I; completed                                  | NCT01555268 (S143)                          |
| Trebananib + pegylated liposomal doxorubicin or topotecan                                            | Ovarian, fallopian tube, primary or peritoneal cancer | Acceptable toxicity of trebananib + pegylated liposomal doxorubicin or topotecan; associated with antitumour activity                               | Phase I; completed                                  | NCT01253681 (S144)                          |
|                                                                                                      |                                                       | No results available                                                                                                                                | Phase I; completed                                  | NCT00770536                                 |
| Trebananib + paclitaxel and trastuzumab, or capecitabine and lapatinib                               | Locally recurrent or metastatic breast cancer         | Trebananib 10 mg/kg (A1) and 30 mg/kg (A3) + paclitaxel and trastuzumab tolerable; ORR 80% (A1) and 88.2% (A3); PFS 14.5 mo. (A1) and 18.7 mo. (A3) | Phase I; completed                                  | NCT00807859 (S145)                          |
| Trebananib + pemetrexed and carboplatin                                                              | Non-small-cell lung cancer                            | No results available                                                                                                                                | Phase 1b/II; completed                              | NCT01666977                                 |
| <i>Phase II studies</i>                                                                              |                                                       |                                                                                                                                                     |                                                     |                                             |
| CVX-060                                                                                              | Glioblastoma                                          | Not applicable                                                                                                                                      | Phase II; withdrawn prior to enrolment <sup>b</sup> | NCT01225510                                 |
| Trebananib                                                                                           | Adult angiosarcoma or soft-tissue sarcoma             | No PRs or CRs; protracted estimated PFS (3.5–5.5 mo.) observed in 4 of 16 patients (no comparator arm)                                              | Phase II; completed                                 | NCT01623869 (S146)                          |
|                                                                                                      | Endometrial carcinoma                                 | Insufficient single-agent activity                                                                                                                  | Phase II; completed                                 | NCT01210222 (S147)                          |
| Trebananib + paclitaxel                                                                              | Ovarian, fallopian tube, primary or peritoneal cancer | Trebananib combined with weekly paclitaxel tolerable; evidence of antitumour activity and a dose-response effect                                    | Phase II; completed                                 | NCT00479817 (S148)                          |
| Trebananib + FOLFIRI                                                                                 | Colorectal cancer                                     | Estimated PFS unchanged with trebananib + FOLFIRI compared with placebo + FOLFIRI                                                                   | Phase II; completed                                 | NCT00752570 (S149)                          |
| Trebananib or placebo + cisplatin and capecitabine                                                   | Gastrointestinal cancer                               | Estimated PFS and ORRs similar with cisplatin and capecitabine ± trebananib                                                                         | Phase II; completed                                 | NCT00583674 (S150)                          |
| Trebananib + abiraterone                                                                             | Metastatic castration-resistant prostate cancer       | Well tolerated and acceptable safety profile                                                                                                        | Phase II; active, not recruiting                    | NCT01553188 (S151)                          |
| Trebananib + docetaxel                                                                               | Urothelial carcinoma                                  | Not applicable                                                                                                                                      | Phase II; withdrawn prior to enrolment <sup>c</sup> | NCT01907308                                 |
| Trebananib + sunitinib (pan-VEGFR, pan-PDGFR, KIT, RET, FLT3, G-CSF-R TKI)                           | Advanced-stage renal cell carcinoma                   | Estimated PFS 13.9 mo. with sunitinib + 10 mg/kg trebananib vs 16.3 mo. with sunitinib + 15 mg/kg trebananib                                        | Phase II; active, not recruiting                    | NCT00853372 (S152)                          |
| Trebananib ± bevacizumab                                                                             | Recurrent glioblastoma                                | Trebananib was well tolerated but ineffective as a monotherapy; combination did not have enhanced efficacy over bevacizumab monotherapy             | Phase I/II; completed                               | NCT01290263 (S153)                          |
|                                                                                                      |                                                       |                                                                                                                                                     | Phase II; active, not recruiting                    | NCT01609790                                 |

| Phase III studies                            |                                                       |                                                                                                                                                      |                                    |                               |
|----------------------------------------------|-------------------------------------------------------|------------------------------------------------------------------------------------------------------------------------------------------------------|------------------------------------|-------------------------------|
| Trebananib + paclitaxel and carboplatin      | Ovarian, fallopian tube, primary or peritoneal cancer | No results available                                                                                                                                 | Phase III; terminated <sup>d</sup> | NCT01493505; TRINOVA-3        |
| Trebananib + paclitaxel                      | Ovarian, fallopian tube, primary or peritoneal cancer | PFS2 1.6 mo. longer with trebananib + paclitaxel vs paclitaxel alone; OS 2.2 mo. longer with combination vs paclitaxel alone in patient with ascites | Phase III; completed               | NCT01204749; TRINOVA-1 (S154) |
| Trebananib + pegylated liposomal doxorubicin | Ovarian, fallopian tube, primary or peritoneal cancer | Median PFS 7.6 mo. with trebananib vs 7.2 mo. with placebo; ORR 46% vs 21%; DOR 7.4 mo. vs 3.9 mo.                                                   | Phase III; terminated <sup>b</sup> | NCT01281254; TRINOVA-2 (S155) |

On the basis of a systematic search of the PubMed database website using selected search terms from the abbreviations list. ANG1, angiopoietin 1; ANG2, angiopoietin 2; CRs, complete response; CTLA-4, cytotoxic T lymphocyte protein 4; FOLFIRI, folinic acid (leucovorin), 5-fluorouracil, and irinotecan; G-CSF-R, granulocyte colony-stimulating factor receptor; mAb, monoclonal antibody; mo., months; MTD, maximum tolerated dose; mTOR, mechanistic target of rapamycin; ORRs, objective response rates; OS, overall survival; PDGFR, platelet-derived growth factor receptor; PFS, progression-free survival; PRs, partial responses; TIE2, angiopoietin 1 receptor; TKI, tyrosine kinase inhibitor; VEGF, vascular endothelial growth factor; VEGFR, vascular endothelial growth factor receptor. <sup>a</sup>Dose-escalation phase completed; dose-expansion phase not conducted owing to business decision. <sup>b</sup>Reasons unknown. <sup>c</sup>Sponsor's decision. <sup>d</sup>Administrator's decision

Supplementary Table S9 | Preclinical studies investigating combined inhibition of the ANG2 and VEGF pathways

| Agent(s)                                                                                                                                                                                                                                                     | Disease (model)                                                                                                                                                                                        | Results                                                                                                                                                                                                                                                                            | Reference |
|--------------------------------------------------------------------------------------------------------------------------------------------------------------------------------------------------------------------------------------------------------------|--------------------------------------------------------------------------------------------------------------------------------------------------------------------------------------------------------|------------------------------------------------------------------------------------------------------------------------------------------------------------------------------------------------------------------------------------------------------------------------------------|-----------|
| <b>VEGF and ANG2 neutralizing agents</b>                                                                                                                                                                                                                     |                                                                                                                                                                                                        |                                                                                                                                                                                                                                                                                    |           |
| L1-10 (anti-ANG2 peptibody) + bevacizumab (anti-VEGFA mAb <sup>a</sup> )                                                                                                                                                                                     | Subcutaneous colon cancer xenografts (LS 174T)                                                                                                                                                         | Dual targeting of VEGF and ANG2 achieved effective normalization (pericyte coverage, vascular integrity, adherence junctions and perfusion) at only one-tenth of the dose required with bevacizumab alone                                                                          | S156      |
| 3.19.3 (anti-ANG2 mAb) + bevacizumab                                                                                                                                                                                                                         | Multiple subcutaneous xenograft models                                                                                                                                                                 | Decreased tumour growth with 3.19.3; antitumour activity increased when combined with bevacizumab or chemotherapy                                                                                                                                                                  | S157      |
| 3.19.3 + DC101 (anti VEGFR2 mAb)                                                                                                                                                                                                                             | PNET (RIP1-Tag2), breast cancer (MMTV-PyMT)                                                                                                                                                            | Dual ANG2/VEGFR inhibition has superior efficacy against PNETs compared with anti-VEGF alone, whereas only minor additive effects were observed in the breast cancer model                                                                                                         | S102      |
| DC101 + TIE2-based decoy receptor for ANG2                                                                                                                                                                                                                   | Glioblastoma (GL261, U87)                                                                                                                                                                              | Tumour invasiveness was decreased under dual ANG2/VEGFR2 inhibition compared with DC101 alone                                                                                                                                                                                      | S158      |
| Double antiangiogenic protein (DAAP; VEGFA and ANG1/2 decoy receptor), VEGF-Trap, or TIE2-Fc fusion                                                                                                                                                          | Subcutaneous melanoma (LLC and B16/F10), orthotopic colon cancer (CT-26), peritoneal human ovarian cancer (MDAH-2774)                                                                                  | Dual TIE2/VEGF inhibition decreased tumour growth, reduced vascular leakage, and lowered the frequency of ascites compared with VEGF or TIE2 blockade alone                                                                                                                        | S159      |
| L1-7(N) + anti-VEGFA antibody (clone 26503; R&D Systems)                                                                                                                                                                                                     | Subcutaneous colon cancer xenograft model (Colo205)                                                                                                                                                    | ANG2 inhibition complemented anti-VEGF therapy (substantial decreases in vessel sprouting, vessel density, and tumour growth)                                                                                                                                                      | S160      |
| Trebananib (AMG 386; anti-ANG1/2 peptibody) + aflibercept (VEGFR1/2-Fc decoy receptor for VEGFA/B and PlGF)                                                                                                                                                  | Glioblastoma (GL261)                                                                                                                                                                                   | Dual ANG2/VEGF inhibition prolonged survival compared with anti-VEGF therapy alone                                                                                                                                                                                                 | S116      |
| Vanucizumab (dual anti-ANG2 and anti-VEGFA mAb)                                                                                                                                                                                                              | Multiple orthotopic and subcutaneous xenograft models                                                                                                                                                  | Reduced tumour MVD, increased vascular maturity, and decreased tumour growth                                                                                                                                                                                                       | S161      |
| Vanucizumab or B20 (anti-VEGFA mAb)                                                                                                                                                                                                                          | Glioblastoma (murine GL261 and patient-derived MGG8)                                                                                                                                                   | Prolonged survival; reduced immunosuppression imparted by pro-tumour macrophages compared with IgG treated and anti-VEGF treated animals                                                                                                                                           | S117      |
| Vanucizumab                                                                                                                                                                                                                                                  | Subcutaneous colon cancer xenografts model (Colo205)                                                                                                                                                   | Decreased tumour growth                                                                                                                                                                                                                                                            | S162      |
| Vanucizumab                                                                                                                                                                                                                                                  | Orthotopic breast cancer (MMTV-Py), melanoma (B16 ova), PNET models (RIP1-Tag2)                                                                                                                        | Decreased tumour growth and prolonged survival                                                                                                                                                                                                                                     | S163      |
| Sunitinib (VEGFR1-3, PDGFR $\alpha/\beta$ , KIT, RET, FLT3, G-CSF-R TKI), or CVX-060 (PF-04856884; anti-ANG2 peptibody) or regorafenib (VEGFR2/3, RET, KIT, TIE2, PDGFR and RAF TKI), or CVX-241 (dual anti-ANG2 and anti-VEGF peptibody) ( $\pm$ anti-PD-1) | Orthotopic breast (EMT-6, MDA-MB-231.LM2-4), colon (HCT116, HT29), RCC (RENCA) tumour models                                                                                                           | Inhibition of tumour growth and metastasis, and prolongation of animal survival: markedly greater with anti-VEGF/ANG2 agents than with anti-VEGF or anti-ANG2 agents alone in breast and colon cancer models. Broad spectrum TKI (sunitinib) had the best efficacy in an RCC model | S164      |
| <b>VEGFR TKI with TIE2 inhibitory activity, or without such activity but combined with an anti-ANG2 agent</b>                                                                                                                                                |                                                                                                                                                                                                        |                                                                                                                                                                                                                                                                                    |           |
| CEP-11981 (pan-VEGFR and TIE2 TKI)                                                                                                                                                                                                                           | Subcutaneous: melanoma, glioblastoma, prostate carcinoma (models not specified)<br>Orthotopic: solid (colon carcinoma, renal carcinoma, and glioblastoma) and haematological cancers (acute leukaemia) | Reduced tumour MVD and decreased tumour growth                                                                                                                                                                                                                                     | S165      |
| Pexmetinib (ARRY-614; p38 and TIE2 kinase inhibitor)                                                                                                                                                                                                         | Plasmocytoma (RPMI 8226)                                                                                                                                                                               | Decreased tumour growth                                                                                                                                                                                                                                                            | S166      |
| Sorafenib (pan-VEGFR, pan-PDGFR, pan-FGFR, KIT, RET, FLT3, CRAF, BRAF, and TIE2 TKI) + DC101 (anti-VEGFR2 mAb)                                                                                                                                               | Metastatic colon cancer (CT26)                                                                                                                                                                         | Decreased angiogenesis, tumour growth, and metastasis                                                                                                                                                                                                                              | S167      |
| Cediranib (AZD 2171; pan-VEGFR TKI) and MEDI3617 (anti-ANG2 mAb)                                                                                                                                                                                             | Glioblastoma (murine GL261 and human U87)                                                                                                                                                              | Prolonged survival and enhanced antitumour immunity compared with cediranib treated and untreated control animals                                                                                                                                                                  | S168      |
| Regorafenib                                                                                                                                                                                                                                                  | Breast (MDA-MB-231), colon (Colo205), or RCC (786-O) tumour models                                                                                                                                     | Reduced tumour MVD (breast & colon cancers), and decreased tumour growth                                                                                                                                                                                                           | S169      |
| Glesatinib (MGCD265; MET, TIE2, VEGFR1-3, and MST1R TKI)                                                                                                                                                                                                     | Breast, kidney, pancreatic, and lung carcinoma models (not specified)                                                                                                                                  | Decreased tumour growth                                                                                                                                                                                                                                                            | S170      |

|            |                           |                                                                                                                   |      |
|------------|---------------------------|-------------------------------------------------------------------------------------------------------------------|------|
| Glesatinib | Multiple xenograft models | Tumour growth slowed with glesatinib plus a taxane or erlotinib compared with taxane or erlotinib treatment alone | S171 |
|------------|---------------------------|-------------------------------------------------------------------------------------------------------------------|------|

On the basis of a systematic search of the PubMed database website using selected search terms from the abbreviations list. ANG1, angiopoietin 1; ANG2, angiopoietin 2; FGFR, fibroblast growth factor receptor; mAb, monoclonal antibody; MST1R, macrophage-stimulating protein receptor; MVD, microvessel density; PDGFR, platelet-derived growth factor receptor; PIGF, placental growth factor; RCC, renal cell carcinoma; TKI, tyrosine kinase inhibitor; VEGF, vascular endothelial growth factor; VEGFR, vascular endothelial growth factor receptor. <sup>a</sup>Bevacizumab neutralises human VEGFA but not mouse VEGFA.

Supplementary Table S10 | Clinical studies of VEGF pathway inhibitors combined with ANG2 or dual ANG1/2 inhibitors

| Treatments                                                                                                                      | Disease                                                          | Phase; status                                                                  | Results                                                                                                       | ClinicalTrials.gov identifier (publication) |
|---------------------------------------------------------------------------------------------------------------------------------|------------------------------------------------------------------|--------------------------------------------------------------------------------|---------------------------------------------------------------------------------------------------------------|---------------------------------------------|
| <b>VEGF + ANG1/2 neutralizing agent</b>                                                                                         |                                                                  |                                                                                |                                                                                                               |                                             |
| Nesvacumab (REGN910/SAR307746 (anti-ANG2 mAb) + aflibercept (VEGFR1/2-Fc decoy receptor for VEGFA/B and PlGF))                  | Solid tumours                                                    | Phase I; completed                                                             | Regimen well tolerated                                                                                        | NCT01688960 (S172)                          |
| Trebananib (AMG 386; anti-ANG1/2 peptibody) + bevacizumab (anti-VEGFA antibody)                                                 | Metastatic CRC                                                   | Phase II; unknown                                                              | ORR greater than historical rates with bevacizumab alone                                                      | NCT01249521 (S173)                          |
|                                                                                                                                 | Glioblastoma                                                     | Phase I/II; completed                                                          | 6-month PFS 24% with combined therapy vs 0% with trebananib alone                                             | NCT01290263                                 |
|                                                                                                                                 | Adult glioblastoma, gliosarcoma, or oligodendroglioma            | Phase II; active, not recruiting                                               | 6-month PFS 23% with combination therapy vs 41% with bevacizumab alone                                        | NCT01609790                                 |
| Trebananib + paclitaxel +/- bevacizumab                                                                                         | Locally recurrent and metastatic HER2 <sup>-</sup> breast cancer | Phase II; completed                                                            | No prolongation of estimated PFS                                                                              | NCT00511459 (S174)                          |
| Vanucizumab (dual anti-ANG2 and anti-VEGFA mAb) + RO7009789 (agonistic anti-CD40 mAb)                                           | Advanced-stage solid tumours                                     | Phase I; recruiting                                                            | Not available                                                                                                 | NCT02665416                                 |
| Vanucizumab or bevacizumab + mFOLFOX6                                                                                           | Untreated metastatic CRC                                         | Phase II; completed                                                            | Not available                                                                                                 | NCT02141295                                 |
| CVX-241 (dual anti-ANG2 and anti-VEGF peptibody)                                                                                | Advanced-stage solid tumours                                     | Phase I; terminated (owing to the lack of significant pharmacological effects) | No safety concerns but terminated early by the sponsor                                                        | NCT01004822 (S175)                          |
| <b>VEGFR TKI/antagonist + ANG-2 neutralizing agent</b>                                                                          |                                                                  |                                                                                |                                                                                                               |                                             |
| Trebananib + sorafenib (pan-VEGFR, pan-PDGFR, pan-FGFR, KIT, RET, FLT3, CRAF, BRAF, and TIE2 TKI)                               | Advanced-stage RCC                                               | Phase II; completed                                                            | Tolerable, but no PFS prolongation                                                                            | NCT00467025 (S176)                          |
|                                                                                                                                 | Advanced-stage, inoperable HCC                                   | Phase II; completed                                                            | No improvement in PFS vs historical controls                                                                  | NCT00872014 (S177)                          |
| CVX-060 (PF-04856884; anti-ANG2 peptibody) and axitinib (pan-VEGFR, pan-PDGFR, and KIT TKI)                                     | Metastatic RCC                                                   | Phase II; terminated owing to poor tolerability                                | ORR 11.1%; treatment-related thromboembolic events observed                                                   | NCT01441414 (S178)                          |
| Trebananib + bevacizumab, sorafenib, sunitinib (pan-VEGFR, pan-PDGFR, KIT, RET, FLT3, G-CSF-R TKI) or AMG 706 (anti-ANG1/2 mAb) | Advanced-stage solid tumours                                     | Phase I; completed                                                             | Antitumour activity was observed                                                                              | NCT00861419 (S179)                          |
| CVX-060 + sunitinib                                                                                                             | Advanced-stage RCC                                               | Phase II; terminated owing to adverse safety signals                           | Owing to data safety signals in a separate clinical trial with CVX-060, all CVX-060 studies were discontinued | NCT00982657                                 |
| Trebananib + bevacizumab, pazopanib (pan-VEGFR1-3, pan-PDGFR, pan-FGFR, KIT TKI), sorafenib, or sunitinib                       | Recurrent RCC                                                    | Phase II; active, not recruiting                                               | Not available                                                                                                 | NCT01664182                                 |
| LY3127804 (anti-ANG2 mAb) ± ramucirumab (anti-VEGFR2 mAb) ± paclitaxel                                                          | Advanced-stage solid tumours                                     | Phase I; completed                                                             | Not available                                                                                                 | NCT02597036                                 |

On the basis of a systematic search of the PubMed, Google Scholar, ClinicalTrials.gov, and FDA Oncology databases, and the *Journal of Clinical Oncology* website using selected from the abbreviations list. ANG1, angiopoietin 1; ANG2, angiopoietin 2; CRC, colorectal cancer; FGFR, fibroblast growth factor receptor; G-CSF-R, granulocyte colony-stimulating factor receptor; HCC, hepatocellular carcinoma; mAb, monoclonal antibody; mFOLFOX6, modified FOLFOX, folinic acid (leucovorin), 5-fluorouracil, and oxaliplatin) regimen; mo., month; ORR, objective response rate; PDGFR, platelet-derived growth factor receptor; PFS, progression-free survival; PlGF, placental growth factor; RCC, renal cell carcinoma; TKI, tyrosine kinase inhibitor; VEGF, vascular endothelial growth factor; VEGFR, vascular endothelial growth factor receptor.

## Supplementary reference list

- S1 Le, D. T. *et al.* PD-1 Blockade in Tumors with Mismatch-Repair Deficiency. *N Engl J Med* **372**, 2509-2520, doi:10.1056/NEJMoa1500596 (2015).
- S2 Le, D. T. *et al.* Mismatch repair deficiency predicts response of solid tumors to PD-1 blockade. *Science* **357**, 409-413, doi:10.1126/science.aan6733 (2017).
- S3 Diaz, L. A. *et al.* KEYNOTE-177: Randomized phase III study of pembrolizumab versus investigator-choice chemotherapy for mismatch repair-deficient or microsatellite instability-high metastatic colorectal carcinoma. *Journal of Clinical Oncology* **35**, TPS815-TPS815, doi:10.1200/JCO.2017.35.4\_suppl.TPS815 (2017).
- S4 Robert, C. *et al.* Ipilimumab plus dacarbazine for previously untreated metastatic melanoma. *N Engl J Med* **364**, 2517-2526, doi:10.1056/NEJMoa1104621 (2011).
- S5 Robert, C. *et al.* Nivolumab in previously untreated melanoma without BRAF mutation. *N Engl J Med* **372**, 320-330, doi:10.1056/NEJMoa1412082 (2015).
- S6 Weber, J. S. *et al.* Nivolumab versus chemotherapy in patients with advanced melanoma who progressed after anti-CTLA-4 treatment (CheckMate 037): a randomised, controlled, open-label, phase 3 trial. *Lancet Oncol* **16**, 375-384, doi:10.1016/S1470-2045(15)70076-8 (2015).
- S7 Eggermont, A. M. *et al.* Adjuvant ipilimumab versus placebo after complete resection of high-risk stage III melanoma (EORTC 18071): a randomised, double-blind, phase 3 trial. *Lancet Oncol* **16**, 522-530, doi:10.1016/S1470-2045(15)70122-1 (2015).
- S8 Robert, C. *et al.* Pembrolizumab versus Ipilimumab in Advanced Melanoma. *N Engl J Med* **372**, 2521-2532, doi:10.1056/NEJMoa1503093 (2015).
- S9 Postow, M. A. *et al.* Nivolumab and ipilimumab versus ipilimumab in untreated melanoma. *N Engl J Med* **372**, 2006-2017, doi:10.1056/NEJMoa1414428 (2015).
- S10 Wolchok, J. D. *et al.* Overall Survival with Combined Nivolumab and Ipilimumab in Advanced Melanoma. *N Engl J Med* **377**, 1345-1356, doi:10.1056/NEJMoa1709684 (2017).
- S11 Ascierto, P. A. *et al.* Ipilimumab 10 mg/kg versus ipilimumab 3 mg/kg in patients with unresectable or metastatic melanoma: a randomised, double-blind, multicentre, phase 3 trial. *Lancet Oncol* **18**, 611-622, doi:10.1016/S1470-2045(17)30231-0 (2017).
- S12 Weber, J. *et al.* Adjuvant Nivolumab versus Ipilimumab in Resected Stage III or IV Melanoma. *N Engl J Med*, doi:10.1056/NEJMoa1709030 (2017).
- S13 Brahmer, J. *et al.* Nivolumab versus Docetaxel in Advanced Squamous-Cell Non-Small-Cell Lung Cancer. *N Engl J Med* **373**, 123-135, doi:10.1056/NEJMoa1504627 (2015).
- S14 Borghaei, H. *et al.* Nivolumab versus Docetaxel in Advanced Nonsquamous Non-Small-Cell Lung Cancer. *N Engl J Med* **373**, 1627-1639, doi:10.1056/NEJMoa1507643 (2015).
- S15 Herbst, R. S. *et al.* Pembrolizumab versus docetaxel for previously treated, PD-L1-positive, advanced non-small-cell lung cancer (KEYNOTE-010): a randomised controlled trial. *Lancet* **387**, 1540-1550, doi:10.1016/S0140-6736(15)01281-7 (2016).
- S16 Reck, M. *et al.* Pembrolizumab versus Chemotherapy for PD-L1-Positive Non-Small-Cell Lung Cancer. *N Engl J Med* **375**, 1823-1833, doi:10.1056/NEJMoa1606774 (2016).
- S17 Barlesi, F. *et al.* Primary analysis from OAK, a randomized phase III study comparing atezolizumab with docetaxel in 2L/3L NSCLC. *Annals of Oncology* **27** (2016).
- S18 Langer, C. J. *et al.* Carboplatin and pemetrexed with or without pembrolizumab for advanced, non-squamous non-small-cell lung cancer: a randomised, phase 2 cohort of the open-label KEYNOTE-021 study. *Lancet Oncol* **17**, 1497-1508, doi:10.1016/S1470-2045(16)30498-3 (2016).
- S19 Antonia, S. J. *et al.* Durvalumab after Chemoradiotherapy in Stage III Non-Small-Cell Lung Cancer. *N Engl J Med* **377**, 1919-1929, doi:10.1056/NEJMoa1709937 (2017).
- S20 Kwon, E. D. *et al.* Ipilimumab versus placebo after radiotherapy in patients with metastatic castration-resistant prostate cancer that had progressed after docetaxel chemotherapy (CA184-



- 043): a multicentre, randomised, double-blind, phase 3 trial. *Lancet Oncology* **15**, 700-712, doi:10.1016/S1470-2045(14)70189-5 (2014).
- S21 Motzer, R. J. *et al.* Nivolumab versus Everolimus in Advanced Renal-Cell Carcinoma. *N Engl J Med* **373**, 1803-1813, doi:10.1056/NEJMoa1510665 (2015).
- S22 Rosenberg, J. E. *et al.* Atezolizumab in patients with locally advanced and metastatic urothelial carcinoma who have progressed following treatment with platinum-based chemotherapy: a single-arm, multicentre, phase 2 trial. *Lancet* **387**, 1909-1920, doi:10.1016/S0140-6736(16)00561-4 (2016).
- S23 Balar, A. V. *et al.* Atezolizumab as first-line treatment in cisplatin-ineligible patients with locally advanced and metastatic urothelial carcinoma: a single-arm, multicentre, phase 2 trial. *Lancet* **389**, 67-76, doi:10.1016/S0140-6736(16)32455-2 (2017).
- S24 Sharma, P. *et al.* Nivolumab in metastatic urothelial carcinoma after platinum therapy (CheckMate 275): a multicentre, single-arm, phase 2 trial. *Lancet Oncol* **18**, 312-322, doi:10.1016/S1470-2045(17)30065-7 (2017).
- S25 Bellmunt, J. *et al.* Pembrolizumab as Second-Line Therapy for Advanced Urothelial Carcinoma. *N Engl J Med* **376**, 1015-1026, doi:10.1056/NEJMoa1613683 (2017).
- S26 Powles, T. *et al.* Efficacy and Safety of Durvalumab in Locally Advanced or Metastatic Urothelial Carcinoma: Updated Results From a Phase 1/2 Open-label Study. *JAMA Oncol* **3**, e172411, doi:10.1001/jamaoncol.2017.2411 (2017).
- S27 El-Khoueiry, A. B. *et al.* Nivolumab in patients with advanced hepatocellular carcinoma (CheckMate 040): an open-label, non-comparative, phase 1/2 dose escalation and expansion trial. *Lancet* **389**, 2492-2502, doi:10.1016/S0140-6736(17)31046-2 (2017).
- S28 Overman, M. J. *et al.* Nivolumab in patients with metastatic DNA mismatch repair-deficient or microsatellite instability-high colorectal cancer (CheckMate 142): an open-label, multicentre, phase 2 study. *Lancet Oncol* **18**, 1182-1191, doi:10.1016/S1470-2045(17)30422-9 (2017).
- S29 Fuchs, C. S. *et al.* KEYNOTE-059 cohort 1: Efficacy and safety of pembrolizumab (pembro) monotherapy in patients with previously treated advanced gastric cancer. *Journal of Clinical Oncology* **35**, 4003-4003, doi:10.1200/JCO.2017.35.15\_suppl.4003 (2017).
- S30 Kang, Y. K. *et al.* Nivolumab in patients with advanced gastric or gastro-oesophageal junction cancer refractory to, or intolerant of, at least two previous chemotherapy regimens (ONO-4538-12, ATTRACTION-2): a randomised, double-blind, placebo-controlled, phase 3 trial. *Lancet* **390**, 2461-2471, doi:10.1016/S0140-6736(17)31827-5 (2017).
- S31 Kiyota, N. *et al.* A randomized, open-label, Phase III clinical trial of nivolumab vs. therapy of investigator's choice in recurrent squamous cell carcinoma of the head and neck: A subanalysis of Asian patients versus the global population in checkmate 141. *Oral Oncol* **73**, 138-146, doi:10.1016/j.oraloncology.2017.07.023 (2017).
- S32 Larkins, E. *et al.* FDA Approval Summary: Pembrolizumab for the Treatment of Recurrent or Metastatic Head and Neck Squamous Cell Carcinoma with Disease Progression on or After Platinum-Containing Chemotherapy. *Oncologist* **22**, 873-878, doi:10.1634/theoncologist.2016-0496 (2017).
- S33 Chen, R. *et al.* Phase II Study of the Efficacy and Safety of Pembrolizumab for Relapsed/Refractory Classic Hodgkin Lymphoma. *J Clin Oncol* **35**, 2125-2132, doi:10.1200/JCO.2016.72.1316 (2017).
- S34 Porrata, L. F. *et al.* Infused autograft lymphocyte-to-monocyte ratio and survival in T-cell lymphoma post-autologous peripheral blood hematopoietic stem cell transplantation. *J Hematol Oncol* **8**, 80, doi:10.1186/s13045-015-0178-5 (2015).
- S35 Fanale, M. *et al.* Nivolumab for relapsed/refractory classical hodgkin lymphoma after autologous transplant: full results after extended follow-up of the phase 2 checkmate 205 trial. *Hematological Oncology* **35**, 135-136, doi:10.1002/hon.2437\_124 (2017).

- S36 Van Cutsem, E. *et al.* Addition of aflibercept to fluorouracil, leucovorin, and irinotecan improves survival in a phase III randomized trial in patients with metastatic colorectal cancer previously treated with an oxaliplatin-based regimen. *J Clin Oncol* **30**, 3499-3506, doi:10.1200/JCO.2012.42.8201 (2012).
- S37 Hurwitz, H. *et al.* Bevacizumab plus irinotecan, fluorouracil, and leucovorin for metastatic colorectal cancer. *N Engl J Med* **350**, 2335-2342, doi:10.1056/NEJMoa032691 (2004).
- S38 Giantonio, B. J. *et al.* Bevacizumab in combination with oxaliplatin, fluorouracil, and leucovorin (FOLFOX4) for previously treated metastatic colorectal cancer: results from the Eastern Cooperative Oncology Group Study E3200. *J Clin Oncol* **25**, 1539-1544, doi:10.1200/JCO.2006.09.6305 (2007).
- S39 Sandler, A. *et al.* Paclitaxel-carboplatin alone or with bevacizumab for non-small-cell lung cancer. *N Engl J Med* **355**, 2542-2550, doi:10.1056/NEJMoa061884 (2006).
- S40 Friedman, H. S. *et al.* Bevacizumab alone and in combination with irinotecan in recurrent glioblastoma. *J Clin Oncol* **27**, 4733-4740, doi:10.1200/JCO.2008.19.8721 (2009).
- S41 Escudier, B. *et al.* Phase III trial of bevacizumab plus interferon alfa-2a in patients with metastatic renal cell carcinoma (AVOREN): final analysis of overall survival. *J Clin Oncol* **28**, 2144-2150, doi:10.1200/JCO.2009.26.7849 (2010).
- S42 Bennouna, J. *et al.* Continuation of bevacizumab after first progression in metastatic colorectal cancer (ML18147): a randomised phase 3 trial. *Lancet Oncol* **14**, 29-37, doi:10.1016/S1470-2045(12)70477-1 (2013).
- S43 Tewari, K. S. *et al.* Bevacizumab for advanced cervical cancer: final overall survival and adverse event analysis of a randomised, controlled, open-label, phase 3 trial (Gynecologic Oncology Group 240). *Lancet* **390**, 1654-1663, doi:10.1016/S0140-6736(17)31607-0 (2017).
- S44 Pujade-Lauraine, E. *et al.* Bevacizumab combined with chemotherapy for platinum-resistant recurrent ovarian cancer: The AURELIA open-label randomized phase III trial. *J Clin Oncol* **32**, 1302-1308, doi:10.1200/JCO.2013.51.4489 (2014).
- S45 Aghajanian, C. *et al.* Final overall survival and safety analysis of OCEANS, a phase 3 trial of chemotherapy with or without bevacizumab in patients with platinum-sensitive recurrent ovarian cancer. *Gynecol Oncol* **139**, 10-16, doi:10.1016/j.ygyno.2015.08.004 (2015).
- S46 Coleman, R. L. *et al.* Bevacizumab and paclitaxel-carboplatin chemotherapy and secondary cytoreduction in recurrent, platinum-sensitive ovarian cancer (NRG Oncology/Gynecologic Oncology Group study GOG-0213): a multicentre, open-label, randomised, phase 3 trial. *Lancet Oncol* **18**, 779-791, doi:10.1016/S1470-2045(17)30279-6 (2017).
- S47 Wick, W. *et al.* Lomustine and Bevacizumab in Progressive Glioblastoma. *N Engl J Med* **377**, 1954-1963, doi:10.1056/NEJMoa1707358 (2017).
- S48 Choueiri, T. K. *et al.* Cabozantinib versus everolimus in advanced renal cell carcinoma (METEOR): final results from a randomised, open-label, phase 3 trial. *Lancet Oncol* **17**, 917-927, doi:10.1016/S1470-2045(16)30107-3 (2016).
- S49 Elisei, R. *et al.* Cabozantinib in progressive medullary thyroid cancer. *J Clin Oncol* **31**, 3639-3646, doi:10.1200/JCO.2012.48.4659 (2013).
- S50 Demetri, G. D. *et al.* Efficacy and safety of regorafenib for advanced gastrointestinal stromal tumours after failure of imatinib and sunitinib (GRID): an international, multicentre, randomised, placebo-controlled, phase 3 trial. *Lancet* **381**, 295-302, doi:10.1016/S0140-6736(12)61857-1 (2013).
- S51 Grothey, A. *et al.* Regorafenib monotherapy for previously treated metastatic colorectal cancer (CORRECT): an international, multicentre, randomised, placebo-controlled, phase 3 trial. *Lancet* **381**, 303-312, doi:10.1016/S0140-6736(12)61900-X (2013).
- S52 Bruix, J. *et al.* Regorafenib for patients with hepatocellular carcinoma who progressed on sorafenib treatment (RESORCE): a randomised, double-blind, placebo-controlled, phase 3 trial. *Lancet* **389**, 56-66, doi:10.1016/S0140-6736(16)32453-9 (2017).

- S53 Escudier, B. *et al.* Sorafenib for treatment of renal cell carcinoma: Final efficacy and safety results of the phase III treatment approaches in renal cancer global evaluation trial. *J Clin Oncol* **27**, 3312-3318, doi:10.1200/JCO.2008.19.5511 (2009).
- S54 Llovet, J. M. *et al.* Sorafenib in advanced hepatocellular carcinoma. *N Engl J Med* **359**, 378-390, doi:10.1056/NEJMoa0708857 (2008).
- S55 Brose, M. S. *et al.* Sorafenib in radioactive iodine-refractory, locally advanced or metastatic differentiated thyroid cancer: a randomised, double-blind, phase 3 trial. *Lancet* **384**, 319-328, doi:10.1016/S0140-6736(14)60421-9 (2014).
- S56 Motzer, R. J. *et al.* Axitinib versus sorafenib as second-line treatment for advanced renal cell carcinoma: overall survival analysis and updated results from a randomised phase 3 trial. *Lancet Oncol* **14**, 552-562, doi:10.1016/S1470-2045(13)70093-7 (2013).
- S57 Schlumberger, M. *et al.* Lenvatinib versus placebo in radioiodine-refractory thyroid cancer. *N Engl J Med* **372**, 621-630, doi:10.1056/NEJMoa1406470 (2015).
- S58 Motzer, R. J. *et al.* Lenvatinib, everolimus, and the combination in patients with metastatic renal cell carcinoma: a randomised, phase 2, open-label, multicentre trial. *Lancet Oncol* **16**, 1473-1482, doi:10.1016/S1470-2045(15)00290-9 (2015).
- S59 Chawla, S. P. *et al.* Phase III study of aldoxorubicin vs investigators' choice as treatment for relapsed/refractory soft tissue sarcomas. *Journal of Clinical Oncology* **35**, 11000-11000, doi:10.1200/JCO.2017.35.15\_suppl.11000 (2017).
- S60 Sternberg, C. N. *et al.* A randomised, double-blind phase III study of pazopanib in patients with advanced and/or metastatic renal cell carcinoma: final overall survival results and safety update. *Eur J Cancer* **49**, 1287-1296, doi:10.1016/j.ejca.2012.12.010 (2013).
- S61 Taberero, J. *et al.* Ramucirumab versus placebo in combination with second-line FOLFIRI in patients with metastatic colorectal carcinoma that progressed during or after first-line therapy with bevacizumab, oxaliplatin, and a fluoropyrimidine (RAISE): a randomised, double-blind, multicentre, phase 3 study. *Lancet Oncol* **16**, 499-508, doi:10.1016/S1470-2045(15)70127-0 (2015).
- S62 Garon, E. B. *et al.* Ramucirumab plus docetaxel versus placebo plus docetaxel for second-line treatment of stage IV non-small-cell lung cancer after disease progression on platinum-based therapy (REVEL): a multicentre, double-blind, randomised phase 3 trial. *Lancet* **384**, 665-673, doi:10.1016/S0140-6736(14)60845-X (2014).
- S63 Wilke, H. *et al.* Ramucirumab plus paclitaxel versus placebo plus paclitaxel in patients with previously treated advanced gastric or gastro-oesophageal junction adenocarcinoma (RAINBOW): a double-blind, randomised phase 3 trial. *Lancet Oncol* **15**, 1224-1235, doi:10.1016/S1470-2045(14)70420-6 (2014).
- S64 Fuchs, C. S. *et al.* Ramucirumab monotherapy for previously treated advanced gastric or gastro-oesophageal junction adenocarcinoma (REGARD): an international, randomised, multicentre, placebo-controlled, phase 3 trial. *Lancet* **383**, 31-39, doi:10.1016/S0140-6736(13)61719-5 (2014).
- S65 Motzer, R. J. *et al.* Sunitinib versus interferon alfa in metastatic renal-cell carcinoma. *N Engl J Med* **356**, 115-124, doi:10.1056/NEJMoa065044 (2007).
- S66 Demetri, G. D. *et al.* Efficacy and safety of sunitinib in patients with advanced gastrointestinal stromal tumour after failure of imatinib: a randomised controlled trial. *Lancet* **368**, 1329-1338, doi:10.1016/S0140-6736(06)69446-4 (2006).
- S67 Raymond, E. *et al.* Sunitinib malate for the treatment of pancreatic neuroendocrine tumors. *N Engl J Med* **364**, 501-513, doi:10.1056/NEJMoa1003825 (2011).
- S68 Ravaud, A. *et al.* Adjuvant Sunitinib in High-Risk Renal-Cell Carcinoma after Nephrectomy. *N Engl J Med* **375**, 2246-2254, doi:10.1056/NEJMoa1611406 (2016).
- S69 Wells, S. A., Jr. *et al.* Vandetanib in patients with locally advanced or metastatic medullary thyroid cancer: a randomized, double-blind phase III trial. *J Clin Oncol* **30**, 134-141, doi:10.1200/JCO.2011.35.5040 (2012).

- S70 Thatcher, N. *et al.* P2.03a-025 Randomized, Double-Blind, Phase 3 Study Comparing Biosimilar Candidate ABP 215 with Bevacizumab in Patients with Non-Squamous NSCLC. *Journal of Thoracic Oncology* **12**, S902-S903, doi:10.1016/j.jtho.2016.11.1234 (2017).
- S71 Filon, O. *et al.* Efficacy and safety of BCD-021, bevacizumab biosimilar candidate, compared to Avastin: Results of international multicenter randomized double blind phase III study in patients with advanced non-squamous NSCLC. *Journal of Clinical Oncology* **33**, 8057-8057, doi:10.1200/jco.2015.33.15\_suppl.8057 (2015).
- S72 Hamrah, P., Zhang, Q. & Dana, M. R. Expression of vascular endothelial growth factor receptor-3 (VEGFR-3) in the conjunctiva--a potential link between lymphangiogenesis and leukocyte trafficking on the ocular surface. *Adv Exp Med Biol* **506**, 851-860 (2002).
- S73 Gabrilovich, D. I. *et al.* Production of vascular endothelial growth factor by human tumors inhibits the functional maturation of dendritic cells (vol 2, pg 1096, 1996). *Nature Medicine* **2**, 1267-1267 (1996).
- S74 Riboldi, E. *et al.* Cutting edge: proangiogenic properties of alternatively activated dendritic cells. *J Immunol* **175**, 2788-2792 (2005).
- S75 Sawano, A. *et al.* Flt-1, vascular endothelial growth factor receptor 1, is a novel cell surface marker for the lineage of monocyte-macrophages in humans. *Blood* **97**, 785-791, doi:DOI 10.1182/blood.V97.3.785 (2001).
- S76 Maenhout, S. K., Thielemans, K. & Aerts, J. L. Location, location, location: functional and phenotypic heterogeneity between tumor-infiltrating and non-infiltrating myeloid-derived suppressor cells. *Oncoimmunology*. **3**, e956579, doi:10.4161/21624011.2014.956579 (2014).
- S77 De Palma, M. *et al.* Tie2 identifies a hematopoietic lineage of proangiogenic monocytes required for tumor vessel formation and a mesenchymal population of pericyte progenitors. *Cancer Cell* **8**, 211-226, doi:10.1016/j.ccr.2005.08.002 (2005).
- S78 Coffelt, S. B. *et al.* Angiopoietin 2 stimulates TIE2-expressing monocytes to suppress T cell activation and to promote regulatory T cell expansion. *J Immunol* **186**, 4183-4190, doi:10.4049/jimmunol.1002802 (2011).
- S79 Scholz, A. *et al.* Angiopoietin-2 promotes myeloid cell infiltration in a beta(2)-integrin-dependent manner. *Blood* **118**, 5050-5059, doi:10.1182/blood-2011-03-343293 (2011).
- S80 Murdoch, C., Tazzyman, S., Webster, S. & Lewis, C. E. Expression of Tie-2 by human monocytes and their responses to angiopoietin-2. *J Immunol* **178**, 7405-7411 (2007).
- S81 Basu, A. *et al.* Cutting edge: Vascular endothelial growth factor-mediated signaling in human CD45RO+ CD4+ T cells promotes Akt and ERK activation and costimulates IFN-gamma production. *J Immunol* **184**, 545-549, doi:10.4049/jimmunol.0900397 (2010).
- S82 Gavalas, N. G. *et al.* VEGF directly suppresses activation of T cells from ascites secondary to ovarian cancer via VEGF receptor type 2. *Br J Cancer* **107**, 1869-1875, doi:10.1038/bjc.2012.468 (2012).
- S83 Ohm, J. E. *et al.* VEGF inhibits T-cell development and may contribute to tumor-induced immune suppression. *Blood* **101**, 4878-4886, doi:10.1182/blood-2002-07-1956 (2003).
- S84 Wada, J. *et al.* The contribution of vascular endothelial growth factor to the induction of regulatory T-cells in malignant effusions. *Anticancer Res* **29**, 881-888 (2009).
- S85 Hansen, W. *et al.* Neuropilin 1 deficiency on CD4+Foxp3+ regulatory T cells impairs mouse melanoma growth. *J Exp Med* **209**, 2001-2016, doi:10.1084/jem.20111497 (2012).
- S86 Carretero, R. *et al.* Eosinophils orchestrate cancer rejection by normalizing tumor vessels and enhancing infiltration of CD8(+) T cells. *Nat Immunol* **16**, 609-617, doi:10.1038/ni.3159 (2015).
- S87 Liu, C., Workman, C. J. & Vignali, D. A. Targeting regulatory T cells in tumors. *FEBS J* **283**, 2731-2748, doi:10.1111/febs.13656 (2016).
- S88 Carmeliet, P. & Jain, R. K. Molecular mechanisms and clinical applications of angiogenesis. *Nature* **473**, 298-307, doi:10.1038/nature10144 (2011).

- S89 Melder, R. J. *et al.* During angiogenesis, vascular endothelial growth factor and basic fibroblast growth factor regulate natural killer cell adhesion to tumor endothelium. *Nat Med* **2**, 992-997 (1996).
- S90 Karikoski, M. *et al.* Clever-1/stabilin-1 controls cancer growth and metastasis. *Clin Cancer Res* **20**, 6452-6464, doi:10.1158/1078-0432.CCR-14-1236 (2014).
- S91 Motz, G. T. *et al.* Tumor endothelium FasL establishes a selective immune barrier promoting tolerance in tumors. *Nat Med* **20**, 607-615, doi:10.1038/nm.3541 (2014).
- S92 Hendry, S. A. *et al.* The Role of the Tumor Vasculature in the Host Immune Response: Implications for Therapeutic Strategies Targeting the Tumor Microenvironment. *Front Immunol* **7**, 621, doi:10.3389/fimmu.2016.00621 (2016).
- S93 Scharpfenecker, M., Fiedler, U., Reiss, Y. & Augustin, H. G. The Tie-2 ligand angiopoietin-2 destabilizes quiescent endothelium through an internal autocrine loop mechanism. *J Cell Sci* **118**, 771-780, doi:10.1242/jcs.01653 (2005).
- S94 Daly, C. *et al.* Angiopoietin-2 functions as a Tie2 agonist in tumor models, where it limits the effects of VEGF inhibition. *Cancer Res* **73**, 108-118, doi:10.1158/0008-5472.CAN-12-2064 (2013).
- S95 Reuters. *Roche bid for Avastin follow-on suffers blow with trial failure*, <<http://www.reuters.com/article/us-roche-results-trial-idUSKCN12K1X2>> (2016).
- S96 Lichtenberger, B. M. *et al.* Autocrine VEGF signaling synergizes with EGFR in tumor cells to promote epithelial cancer development. *Cell* **140**, 268-279, doi:10.1016/j.cell.2009.12.046 (2010).
- S97 Grenga, I., Kwilas, A. R., Donahue, R. N., Farsaci, B. & Hodge, J. W. Inhibition of the angiopoietin/Tie2 axis induces immunogenic modulation, which sensitizes human tumor cells to immune attack. *J Immunother Cancer* **3**, 52, doi:10.1186/s40425-015-0096-7 (2015).
- S98 Thomas, M. *et al.* A novel angiopoietin-2 selective fully human antibody with potent anti-tumoral and anti-angiogenic efficacy and superior side effect profile compared to Pan-Angiopoietin-1/-2 inhibitors. *PLoS One* **8**, e54923, doi:10.1371/journal.pone.0054923 (2013).
- S99 Mazzieri, R. *et al.* Targeting the ANG2/TIE2 axis inhibits tumor growth and metastasis by impairing angiogenesis and disabling rebounds of proangiogenic myeloid cells. *Cancer Cell* **19**, 512-526, doi:10.1016/j.ccr.2011.02.005 (2011).
- S100 Srivastava, K. *et al.* Postsurgical adjuvant tumor therapy by combining anti-angiopoietin-2 and metronomic chemotherapy limits metastatic growth. *Cancer Cell* **26**, 880-895, doi:10.1016/j.ccell.2014.11.005 (2014).
- S101 Keskin, D. *et al.* Targeting vascular pericytes in hypoxic tumors increases lung metastasis via angiopoietin-2. *Cell Rep* **10**, 1066-1081, doi:10.1016/j.celrep.2015.01.035 (2015).
- S102 Rigamonti, N. *et al.* Role of angiopoietin-2 in adaptive tumor resistance to VEGF signaling blockade. *Cell Rep* **8**, 696-706, doi:10.1016/j.celrep.2014.06.059 (2014).
- S103 Hu, B. *et al.* Angiopoietin-2 induces human glioma invasion through the activation of matrix metalloprotease-2. *Proc Natl Acad Sci U S A* **100**, 8904-8909, doi:10.1073/pnas.1533394100 (2003).
- S104 Schulz, P. *et al.* Angiopoietin-2 drives lymphatic metastasis of pancreatic cancer. *FASEB J* **25**, 3325-3335, doi:10.1096/fj.11-182287 (2011).
- S105 Imanishi, Y. *et al.* Angiopoietin-2 stimulates breast cancer metastasis through the alpha(5)beta(1) integrin-mediated pathway. *Cancer Res* **67**, 4254-4263, doi:10.1158/0008-5472.CAN-06-4100 (2007).
- S106 Hu, B. *et al.* Angiopoietin 2 induces glioma cell invasion by stimulating matrix metalloprotease 2 expression through the alphavbeta1 integrin and focal adhesion kinase signaling pathway. *Cancer Res* **66**, 775-783, doi:10.1158/0008-5472.CAN-05-1149 (2006).
- S107 Lee, H. S. *et al.* Gln-362 of angiopoietin-2 mediates migration of tumor and endothelial cells through association with alpha5beta1 integrin. *J Biol Chem* **289**, 31330-31340, doi:10.1074/jbc.M114.572594 (2014).

- S108 Sfiligoi, C. *et al.* Angiopoietin-2 expression in breast cancer correlates with lymph node invasion and short survival. *Int J Cancer* **103**, 466-474, doi:10.1002/ijc.10851 (2003).
- S109 Llovet, J. M. *et al.* Plasma biomarkers as predictors of outcome in patients with advanced hepatocellular carcinoma. *Clin Cancer Res* **18**, 2290-2300, doi:10.1158/1078-0432.CCR-11-2175 (2012).
- S110 Motzer, R. J. *et al.* Investigation of novel circulating proteins, germ line single-nucleotide polymorphisms, and molecular tumor markers as potential efficacy biomarkers of first-line sunitinib therapy for advanced renal cell carcinoma. *Cancer Chemother Pharmacol* **74**, 739-750, doi:10.1007/s00280-014-2539-0 (2014).
- S111 Wada, H. *et al.* Expression pattern of angiogenic factors and prognosis after hepatic resection in hepatocellular carcinoma: importance of angiopoietin-2 and hypoxia-induced factor-1 alpha. *Liver Int* **26**, 414-423, doi:10.1111/j.1478-3231.2006.01243.x (2006).
- S112 Helfrich, I. *et al.* Angiopoietin-2 levels are associated with disease progression in metastatic malignant melanoma. *Clin Cancer Res* **15**, 1384-1392, doi:10.1158/1078-0432.CCR-08-1615 (2009).
- S113 Sallinen, H. *et al.* Preoperative angiopoietin-2 serum levels: a marker of malignant potential in ovarian neoplasms and poor prognosis in epithelial ovarian cancer. *Int J Gynecol Cancer* **20**, 1498-1505, doi:10.1111/IGC.0b013e3181f936e3 (2010).
- S114 Detjen, K. M. *et al.* Angiopoietin-2 promotes disease progression of neuroendocrine tumors. *Clin Cancer Res* **16**, 420-429, doi:10.1158/1078-0432.CCR-09-1924 (2010).
- S115 Canadas, I. *et al.* Angiopoietin-2 is a negative prognostic marker in small cell lung cancer. *Lung Cancer* **90**, 302-306, doi:10.1016/j.lungcan.2015.09.023 (2015).
- S116 Scholz, A. *et al.* Endothelial cell-derived angiopoietin-2 is a therapeutic target in treatment-naive and bevacizumab-resistant glioblastoma. *EMBO Mol Med* **8**, 39-57, doi:10.15252/emmm.201505505 (2016).
- S117 Kloepper, J. *et al.* Ang-2/VEGF bispecific antibody reprograms macrophages and resident microglia to anti-tumor phenotype and prolongs glioblastoma survival. *Proc Natl Acad Sci U S A* **113**, 4476-4481, doi:10.1073/pnas.1525360113 (2016).
- S118 Li, J. *et al.* A bispecific antibody (ScBsAbAgn-2/TSPO) target for Ang-2 and TSPO resulted in therapeutic effects against glioblastomas. *Biochem Biophys Res Commun* **472**, 384-391, doi:10.1016/j.bbrc.2016.02.035 (2016).
- S119 Xu, Y. *et al.* The role of serum angiopoietin-2 levels in progression and prognosis of lung cancer: A meta-analysis. *Medicine (Baltimore)* **96**, e8063, doi:10.1097/MD.0000000000008063 (2017).
- S120 Labussiere, M. *et al.* Angiopoietin-2 May Be Involved in the Resistance to Bevacizumab in Recurrent Glioblastoma. *Cancer Invest* **34**, 39-44, doi:10.3109/07357907.2015.1088948 (2016).
- S121 Goede, V. *et al.* Identification of serum angiopoietin-2 as a biomarker for clinical outcome of colorectal cancer patients treated with bevacizumab-containing therapy. *Br J Cancer* **103**, 1407-1414, doi:10.1038/sj.bjc.6605925 (2010).
- S122 Hacker, U. T. *et al.* Evaluation of Angiopoietin-2 as a biomarker in gastric cancer: results from the randomised phase III AVAGAST trial. *Br J Cancer* **114**, 855-862, doi:10.1038/bjc.2016.30 (2016).
- S123 Batchelor, T. T. *et al.* Phase II study of cediranib, an oral pan-vascular endothelial growth factor receptor tyrosine kinase inhibitor, in patients with recurrent glioblastoma. *J Clin Oncol* **28**, 2817-2823, doi:10.1200/JCO.2009.26.3988 (2010).
- S124 Bullock, A. *et al.* Plasma angiopoietin-2 (ANG2) as an angiogenic biomarker in renal cell carcinoma (RCC). *ASCO Annual Meeting Proceedings* **28**, 4630 (2010).
- S125 Wu, X. *et al.* Angiopoietin-2 as a Biomarker and Target for Immune Checkpoint Therapy. *Cancer Immunol Res* **5**, 17-28, doi:10.1158/2326-6066.CIR-16-0206 (2017).
- S126 Inigo, I. V. *et al.* Combination of MEDI3617, a fully human anti-angiopoietin 2 monoclonal antibody, with inhibitors of the VEGF pathway enhances antitumor activity in vivo. (2010).

- S127 Brown, J. L. *et al.* A human monoclonal anti-ANG2 antibody leads to broad antitumor activity in combination with VEGF inhibitors and chemotherapy agents in preclinical models. *Mol Cancer Ther* **9**, 145-156, doi:10.1158/1535-7163.MCT-09-0554 (2010).
- S128 Rennel, E. S. *et al.* A human neutralizing antibody specific to Ang-2 inhibits ocular angiogenesis. *Microcirculation* **18**, 598-607, doi:10.1111/j.1549-8719.2011.00120.x (2011).
- S129 Daly, C. *et al.* REGN910, a fully-human, Ang2-specific monoclonal antibody, inhibits tumor growth as a monotherapy and dramatically potentiates the effects of VEGF Trap (aflibercept). *Cancer Research* **71**, 3290-3290, doi:10.1158/1538-7445.Am2011-3290 (2011).
- S130 Palmer, G. M. *et al.* A novel angiopoietin-derived peptide displays anti-angiogenic activity and inhibits tumour-induced and retinal neovascularization. *Br J Pharmacol* **165**, 1891-1903, doi:10.1111/j.1476-5381.2011.01677.x (2012).
- S131 Huang, H. *et al.* Angiopoietin-2 specific CVX-060 inhibits tumor growth cooperatively with chemotherapy. *Cancer Research* **68**, 2493-2493 (2008).
- S132 Bready, J. V. *et al.* Development and preclinical testing of AMG 780, a fully human antibody targeting angiopoietin 1 (Ang1) and angiopoietin 2 (Ang2). *Cancer Research* **74**, 1022-1022, doi:10.1158/1538-7445.Am2014-1022 (2014).
- S133 Coxon, A. *et al.* Context-dependent role of angiopoietin-1 inhibition in the suppression of angiogenesis and tumor growth: implications for AMG 386, an angiopoietin-1/2-neutralizing peptibody. *Mol Cancer Ther* **9**, 2641-2651, doi:10.1158/1535-7163.MCT-10-0213 (2010).
- S134 Goel, S. *et al.* Effects of vascular-endothelial protein tyrosine phosphatase inhibition on breast cancer vasculature and metastatic progression. *J Natl Cancer Inst* **105**, 1188-1201, doi:10.1093/jnci/djt164 (2013).
- S135 Park, J. S. *et al.* Normalization of Tumor Vessels by Tie2 Activation and Ang2 Inhibition Enhances Drug Delivery and Produces a Favorable Tumor Microenvironment. *Cancer Cell* **30**, 953-967, doi:10.1016/j.ccell.2016.10.018 (2016).
- S136 Papadopoulos, K. P. *et al.* A Phase I First-in-Human Study of Nesvacumab (REGN910), a Fully Human Anti-Angiopoietin-2 (Ang2) Monoclonal Antibody, in Patients with Advanced Solid Tumors. *Clin Cancer Res* **22**, 1348-1355, doi:10.1158/1078-0432.CCR-15-1221 (2016).
- S137 Dowlati, A. *et al.* A Phase I, First-in-Human Study of AMG 780, an Angiopoietin-1 and -2 Inhibitor, in Patients with Advanced Solid Tumors. *Clin Cancer Res* **22**, 4574-4584, doi:10.1158/1078-0432.CCR-15-2145 (2016).
- S138 Herbst, R. S. *et al.* Safety, pharmacokinetics, and antitumor activity of AMG 386, a selective angiopoietin inhibitor, in adult patients with advanced solid tumors. *J Clin Oncol* **27**, 3557-3565, doi:10.1200/JCO.2008.19.6683 (2009).
- S139 Leary, S. *et al.* A phase I trial and pharmacokinetic study of trebananib (AMG386) in children with recurrent or refractory solid tumors: A Children's Oncology Group Phase 1 Consortium report. *ASCO Annual Meeting Proceedings* **31**, 2538 (2013).
- S140 Doi, T. *et al.* Phase 1 study of trebananib (AMG 386), an angiogenesis targeting angiopoietin-1/2 antagonist, in Japanese patients with advanced solid tumors. *Cancer Chemother Pharmacol* **71**, 227-235, doi:10.1007/s00280-012-2000-1 (2013).
- S141 Tan, D. S. P. *et al.* Phase I trial of trebananib (AMG 386) plus temsirolimus (Tr+ T) in patients (pts) with advanced solid tumors (PJC-008/NCI# 9041). *ASCO Annual Meeting Proceedings* **31**, 2534 (2013).
- S142 Diamond, J. R. *et al.* Evaluation of pharmacokinetic (PK) drug-drug interactions (DDI) between trebananib (AMG 386) and paclitaxel (PTX) in patients (pts) with advanced solid tumors. *Journal of Clinical Oncology* **32**, 2584-2584, doi:10.1200/jco.2014.32.15\_suppl.2584 (2014).
- S143 Wang, E. S. *et al.* Phase 1 study of the angiopoietin 1/2 neutralizing peptibody, trebananib, in acute myeloid leukemia. *Journal of Clinical Oncology* **32**, 7082-7082, doi:10.1200/jco.2014.32.15\_suppl.7082 (2014).

- S144 Vergote, I. *et al.* A phase 1b, open-label study of trebananib in combination with paclitaxel and carboplatin in patients with ovarian cancer receiving interval or primary debulking surgery. *Eur J Cancer* **50**, 2408-2416, doi:10.1016/j.ejca.2014.06.010 (2014).
- S145 Kaufman, P. A. *et al.* A phase 1b study of trebananib plus paclitaxel (P) and trastuzumab (T) in patients (pts) with HER2+locally recurrent or metastatic breast cancer (MEW). *Journal of Clinical Oncology* **32** (2014).
- S146 D'Angelo, S. P. *et al.* Alliance A091103: A multicenter phase II study of the angiopoietin-1 and-2 peptibody trebananib (AMG386) for the treatment of angiosarcoma (AS). *ASCO Annual Meeting Proceedings* **32**, 10568 (2014).
- S147 Moore, K. N. *et al.* A phase II trial of trebananib (AMG 386; IND#111071), a selective angiopoietin 1/2 neutralizing peptibody, in patients with persistent/recurrent carcinoma of the endometrium: An NRG/Gynecologic Oncology Group trial. *Gynecol Oncol* **138**, 513-518, doi:10.1016/j.ygyno.2015.07.006 (2015).
- S148 Karlan, B. Y. *et al.* Randomized, double-blind, placebo-controlled phase II study of AMG 386 combined with weekly paclitaxel in patients with recurrent ovarian cancer. *J Clin Oncol* **30**, 362-371, doi:10.1200/JCO.2010.34.3178 (2012).
- S149 Peeters, M. *et al.* A randomised, double-blind, placebo-controlled phase 2 study of trebananib (AMG 386) in combination with FOLFIRI in patients with previously treated metastatic colorectal carcinoma. *Br J Cancer* **108**, 503-511, doi:10.1038/bjc.2012.594 (2013).
- S150 Eatock, M. M. *et al.* Phase II randomized, double-blind, placebo-controlled study of AMG 386 (trebananib) in combination with cisplatin and capecitabine in patients with metastatic gastro-oesophageal cancer. *Ann Oncol* **24**, 710-718, doi:10.1093/annonc/mds502 (2013).
- S151 Ojemuyiwa, M. A. *et al.* A safety study of trebananib (AMG 386) and abiraterone in metastatic castration-resistant prostate cancer. *Journal of Clinical Oncology* **32**, 218-218, doi:10.1200/jco.2014.32.4\_suppl.218 (2014).
- S152 Atkins, M. B. *et al.* Trebananib (AMG 386) in Combination With Sunitinib in Patients With Metastatic Renal Cell Cancer: An Open-Label, Multicenter, Phase II Study. *J Clin Oncol* **33**, 3431-3438, doi:10.1200/JCO.2014.60.6012 (2015).
- S153 Reardon, D. A. *et al.* Phase 2 and biomarker study of trebananib, an angiopoietin-blocking peptibody, with and without bevacizumab for patients with recurrent glioblastoma. *Cancer* <https://doi.org/10.1002/cncr.31172> (2017).
- S154 Monk, B. J. *et al.* Final results of a phase 3 study of trebananib plus weekly paclitaxel in recurrent ovarian cancer (TRINOVA-1): Long-term survival, impact of ascites, and progression-free survival-2. *Gynecol Oncol* **143**, 27-34, doi:10.1016/j.ygyno.2016.07.112 (2016).
- S155 Marth, C. *et al.* ENGOT-ov-6/TRINOVA-2: Randomised, double-blind, phase 3 study of pegylated liposomal doxorubicin plus trebananib or placebo in women with recurrent partially platinum-sensitive or resistant ovarian cancer. *Eur J Cancer* **70**, 111-121, doi:10.1016/j.ejca.2016.09.004 (2017).
- S156 Coutelle, O. *et al.* Dual targeting of Angiopoietin-2 and VEGF potentiates effective vascular normalisation without inducing empty basement membrane sleeves in xenograft tumours. *Br J Cancer* **112**, 495-503, doi:10.1038/bjc.2014.629 (2015).
- S157 Leow, C. C. *et al.* MEDI3617, a human anti-angiopoietin 2 monoclonal antibody, inhibits angiogenesis and tumor growth in human tumor xenograft models. *Int J Oncol* **40**, 1321-1330, doi:10.3892/ijo.2012.1366 (2012).
- S158 Cortes-Santiago, N. *et al.* Soluble Tie2 overrides the heightened invasion induced by anti-angiogenesis therapies in gliomas. *Oncotarget* **7**, 16146-16157, doi:10.18632/oncotarget.7550 (2016).
- S159 Koh, Y. J. *et al.* Double antiangiogenic protein, DAAP, targeting VEGF-A and angiopoietins in tumor angiogenesis, metastasis, and vascular leakage. *Cancer Cell* **18**, 171-184, doi:10.1016/j.ccr.2010.07.001 (2010).



- S160 Hashizume, H. *et al.* Complementary actions of inhibitors of angiopoietin-2 and VEGF on tumor angiogenesis and growth. *Cancer Res* **70**, 2213-2223, doi:10.1158/0008-5472.CAN-09-1977 (2010).
- S161 Kienast, Y. *et al.* Ang-2-VEGF-A CrossMab, a novel bispecific human IgG1 antibody blocking VEGF-A and Ang-2 functions simultaneously, mediates potent antitumor, antiangiogenic, and antimetastatic efficacy. *Clin Cancer Res* **19**, 6730-6740, doi:10.1158/1078-0432.CCR-13-0081 (2013).
- S163 Baker, L. C. *et al.* Acute tumour response to a bispecific Ang-2-VEGF-A antibody: insights from multiparametric MRI and gene expression profiling. *Br J Cancer* **115**, 691-702, doi:10.1038/bjc.2016.236 (2016).
- S163 Schmittnaegel, M. *et al.* Dual angiopoietin-2 and VEGFA inhibition elicits antitumor immunity that is enhanced by PD-1 checkpoint blockade. *Sci Transl Med* **9**, doi:10.1126/scitranslmed.aak9670 (2017).
- S164 Wu, F. T. *et al.* Efficacy of Cotargeting Angiopoietin-2 and the VEGF Pathway in the Adjuvant Postsurgical Setting for Early Breast, Colorectal, and Renal Cancers. *Cancer Res* **76**, 6988-7000, doi:10.1158/0008-5472.CAN-16-0888 (2016).
- S165 Ruggeri, B. A. *et al.* CEP-11981: A potent TIE-2/Pan-VEGF-R inhibitor with broad kinase inhibitory activity exhibits significant antitumor and antiangiogenic efficacy in preclinical tumor models. *Molecular Cancer Therapeutics* **6**, 3515s-3516s (2007).
- S166 Winski, S. *et al.* Abstract #331: Activity of ARRY-614, an inhibitor of p38 map kinase and angiogenic targets, in hematologic malignancies. *Cancer Research* **69**, 331-331 (2009).
- S167 Abou-Elkacem, L. *et al.* Regorafenib inhibits growth, angiogenesis, and metastasis in a highly aggressive, orthotopic colon cancer model. *Mol Cancer Ther* **12**, 1322-1331, doi:10.1158/1535-7163.MCT-12-1162 (2013).
- S168 Peterson, T. E. *et al.* Dual inhibition of Ang-2 and VEGF receptors normalizes tumor vasculature and prolongs survival in glioblastoma by altering macrophages. *Proc Natl Acad Sci U S A* **113**, 4470-4475, doi:10.1073/pnas.1525349113 (2016).
- S169 Wilhelm, S. M. *et al.* Regorafenib (BAY 73-4506): a new oral multikinase inhibitor of angiogenic, stromal and oncogenic receptor tyrosine kinases with potent preclinical antitumor activity. *Int J Cancer* **129**, 245-255, doi:10.1002/ijc.25864 (2011).
- S170 Beaulieu, N. *et al.* Preclinical development of MGCD265, a potent orally active c-Met/VEGFR multi-target kinase inhibitor. *Cancer Research* **68**, 4838-4838 (2008).
- S171 Besterman, J. M. *et al.* Potent preclinical antitumor activity of MGCD265, an oral Met/VEGFR kinase inhibitor in phase II clinical development, in combination with taxanes or erlotinib. *ASCO Annual Meeting Proceedings* **28**, e13595 (2010).
- S172 Papadopoulos, K. P. *et al.* A phase 1b study of combined angiogenesis blockade with nesvacumab, a selective monoclonal antibody (MAb) to angiopoietin-2 (Ang2) and ziv-aflibercept in patients with advanced solid malignancies. *ASCO Annual Meeting Proceedings* **32**, 2522 (2014).
- S173 Mooi, J. *et al.* Dual targeting of vascular endothelial growth factor-A (VEGF-A) and angiopoietins (Ang) without chemotherapy in metastatic colorectal cancer (mCRC): Results of the VENGEANCE study. *ASCO Annual Meeting Proceedings* **33**, 3533 (2015).
- S174 Dieras, V. *et al.* Trebananib (AMG 386) plus weekly paclitaxel with or without bevacizumab as first-line therapy for HER2-negative locally recurrent or metastatic breast cancer: A phase 2 randomized study. *Breast* **24**, 182-190, doi:10.1016/j.breast.2014.11.003 (2015).
- S175 Mendelson, D. *et al.* First-in-human dose-escalation safety and PK trial of a novel humanized monoclonal CovX body dual inhibitor of angiopoietin 2 and vascular endothelial growth factor. *ASCO Annual Meeting Proceedings* **29**, 3055 (2011).
- S176 Rini, B. *et al.* AMG 386 in combination with sorafenib in patients with metastatic clear cell carcinoma of the kidney: a randomized, double-blind, placebo-controlled, phase 2 study. *Cancer* **118**, 6152-6161, doi:10.1002/cncr.27632 (2012).

- S177 Abou-Alfa, G. K. *et al.* Phase II study of first-line trebananib plus sorafenib in patients with advanced hepatocellular carcinoma (HCC). *Journal of Clinical Oncology* **32**, 286-286, doi:10.1200/jco.2014.32.3\_suppl.286 (2014).
- S178 Gollerkeri, A. *et al.* Phase Ib safety trial of CVX-060, an intravenous humanized monoclonal CovX body inhibiting angiopoietin 2 (Ang-2), with axitinib in patients with previously treated metastatic renal cell cancer (RCC). *Journal of Clinical Oncology* **31**, 2533-2533, doi:10.1200/jco.2013.31.15\_suppl.2533 (2013).
- S179 Hong, D. S. *et al.* A phase I, open-label study of trebananib combined with sorafenib or sunitinib in patients with advanced renal cell carcinoma. *Clin Genitourin Cancer* **12**, 167-177 e162, doi:10.1016/j.clgc.2013.11.007 (2014).
